# Supplementary material for: Antimicrobial Benzyltetrahydroisoquinoline-Derived Alkaloids from the Leaves of Doryphora aromatica
Source: PubMed Central journal article supplement (PMC8008450; doi:10.1021/acs.jnatprod.0c01093), 2021-03-05
Supplement: np0c01093_si_001.pdf [file np0c01093_si_001.pdf]

## Supporting Information

# Antimicrobial Benzyltetrahydroisoquinoline-Derived Alkaloids from the Leaves of *Doryphora aromatica*

Miaomiao Liu,<sup>†,\*</sup> Jianying Han,<sup>†</sup> Yunjiang Feng,<sup>†</sup> Gordon Guymer,<sup>¶</sup> Paul I. Forster,<sup>¶</sup> and

Ronald J Quinn<sup>†,\*</sup>

<sup>†</sup> Griffith Institute for Drug Discovery, Griffith University, Brisbane, QLD 4111, Australia

<sup>¶</sup> Queensland Herbarium, Department of Environment and Science, Brisbane Botanic Gardens, Brisbane, QLD 4066, Australia

### Contents

Spectroscopic data of phaeantharine trifluoroacetate (1)

**Figure S1.** <sup>1</sup>H NMR spectrum of phaeantharine trifluoroacetate (1)

**Figure S2.** <sup>13</sup>C NMR spectrum of phaeantharine trifluoroacetate (1)

**Figure S3.** COSY NMR spectrum of phaeantharine trifluoroacetate (1)

**Figure S4.** HSQC NMR spectrum of phaeantharine trifluoroacetate (1)

**Figure S5.** HMBC NMR spectrum of phaeantharine trifluoroacetate (1)

**Figure S6.** HRMS spectrum of phaeantharine trifluoroacetate (1)

**Figure S7.** <sup>1</sup>H NMR spectrum of (*R*)-nomimantharine trifluoroacetate (2)

**Figure S8.** <sup>13</sup>C NMR spectrum of (*R*)-nomimantharine trifluoroacetate (2)

**Figure S9.** COSY NMR spectrum of (*R*)-nomimantharine trifluoroacetate (2)

**Figure S10.** HSQC NMR spectrum of (*R*)-nomimantharine trifluoroacetate (2)

**Figure S11.** HMBC NMR spectrum of (*R*)-nomimantharine trifluoroacetate (2)

**Figure S12.** HRMS spectrum of (*R*)-nomimantharine trifluoroacetate (2)

**Figure S13.** <sup>1</sup>H NMR spectrum of 12-de-*O*-methyphaeantharine trifluoroacetate (3)

**Figure S14.** COSY NMR spectrum of 12-de-*O*-methyphaeantharine trifluoroacetate (3)

**Figure S15.** HSQC NMR spectrum of 12-de-*O*-methyphaeantharine trifluoroacetate (3)

**Figure S16.** HMBC NMR spectrum of 12-de-*O*-methyphaeantharine trifluoroacetate (3)

**Figure S17.** HRMS spectrum of 12-de-*O*-methyphaeantharine trifluoroacetate (3)

**Figure S18.** <sup>1</sup>H NMR spectrum of nominanthranal trifluoroacetate (4)

**Figure S19.** COSY NMR spectrum of nominanthranal trifluoroacetate (4)

**Figure S20.** HSQC NMR spectrum of nominanthranal trifluoroacetate (4)

**Figure S21.** HMBC NMR spectrum of nominanthranal trifluoroacetate (4)

**Figure S22.** HRMS spectrum of nominanthranal trifluoroacetate (**4**)

**Figure S23.**  $^1\text{H}$  NMR spectrum of 1-hydroxyl-6,7-dimethoxy-2-methylisoquinoline trifluoroacetate (**5**)

**Figure S24.** COSY NMR spectrum of 1-hydroxyl-6,7-dimethoxy-2-methylisoquinoline trifluoroacetate (**5**)

**Figure S25.** HSQC NMR spectrum of 1-hydroxyl-6,7-dimethoxy-2-methylisoquinoline trifluoroacetate (**5**)

**Figure S26.** HMBC NMR spectrum of 1-hydroxyl-6,7-dimethoxy-2-methylisoquinoline trifluoroacetate (**5**)

**Figure S27.** HRMS spectrum of 1-hydroxyl-6,7-dimethoxy-2-methylisoquinoline trifluoroacetate (**5**)

Table S1. Stable conformers of (*R*)-nomimantharine trifluoroacetate (**2**)

Spectroscopic data of phaeantharine trifluoroacetate (**1**)

*Phaeantharine trifluoroacetate (1)*: bright yellow solid; UV (MeOH)  $\lambda_{\text{max}}$  (log  $\epsilon$ ) 199 nm (1.43), 229 nm (2.24), 256 nm (4.08), 316 nm (0.85);  $^1\text{H}$  NMR (800 MHz, DMSO-*d*<sub>6</sub>) and  $^{13}\text{C}$  NMR data (200 MHz, DMSO-*d*<sub>6</sub>), Tables 1 and 2; (+)-HRESIMS  $m/z$  316.143891 [ $\text{M} - 2\text{CF}_3\text{COO}^-$ ]<sup>2+</sup> (calcd for C<sub>39</sub>H<sub>40</sub>N<sub>2</sub>O<sub>6</sub><sup>2+</sup>, 316.143770),  $m/z$  631.2813 [ $\text{M} - 2\text{CF}_3\text{COO}^- - \text{H}$ ]<sup>+</sup> (calcd for C<sub>39</sub>H<sub>39</sub>N<sub>2</sub>O<sub>6</sub><sup>+</sup>, 631.2802).

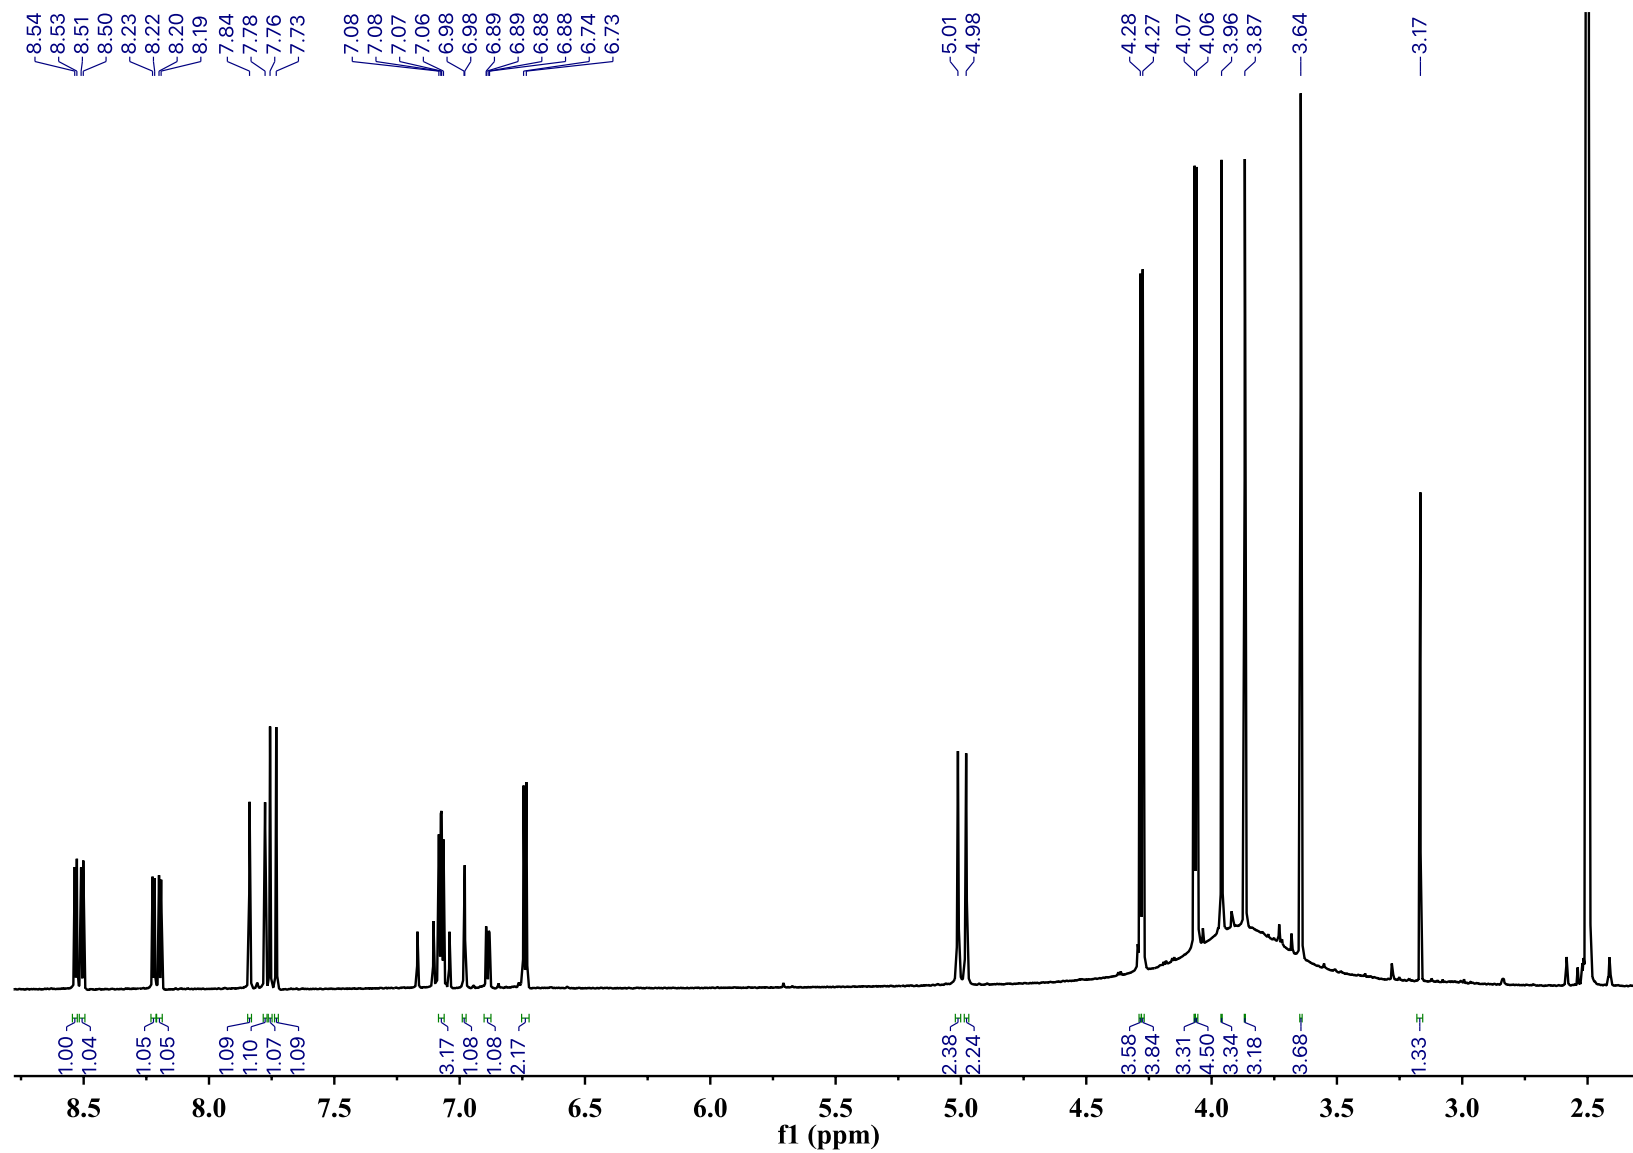

Figure S1. <sup>1</sup>H NMR spectrum of phaeanthrine trifluoroacetate (1)

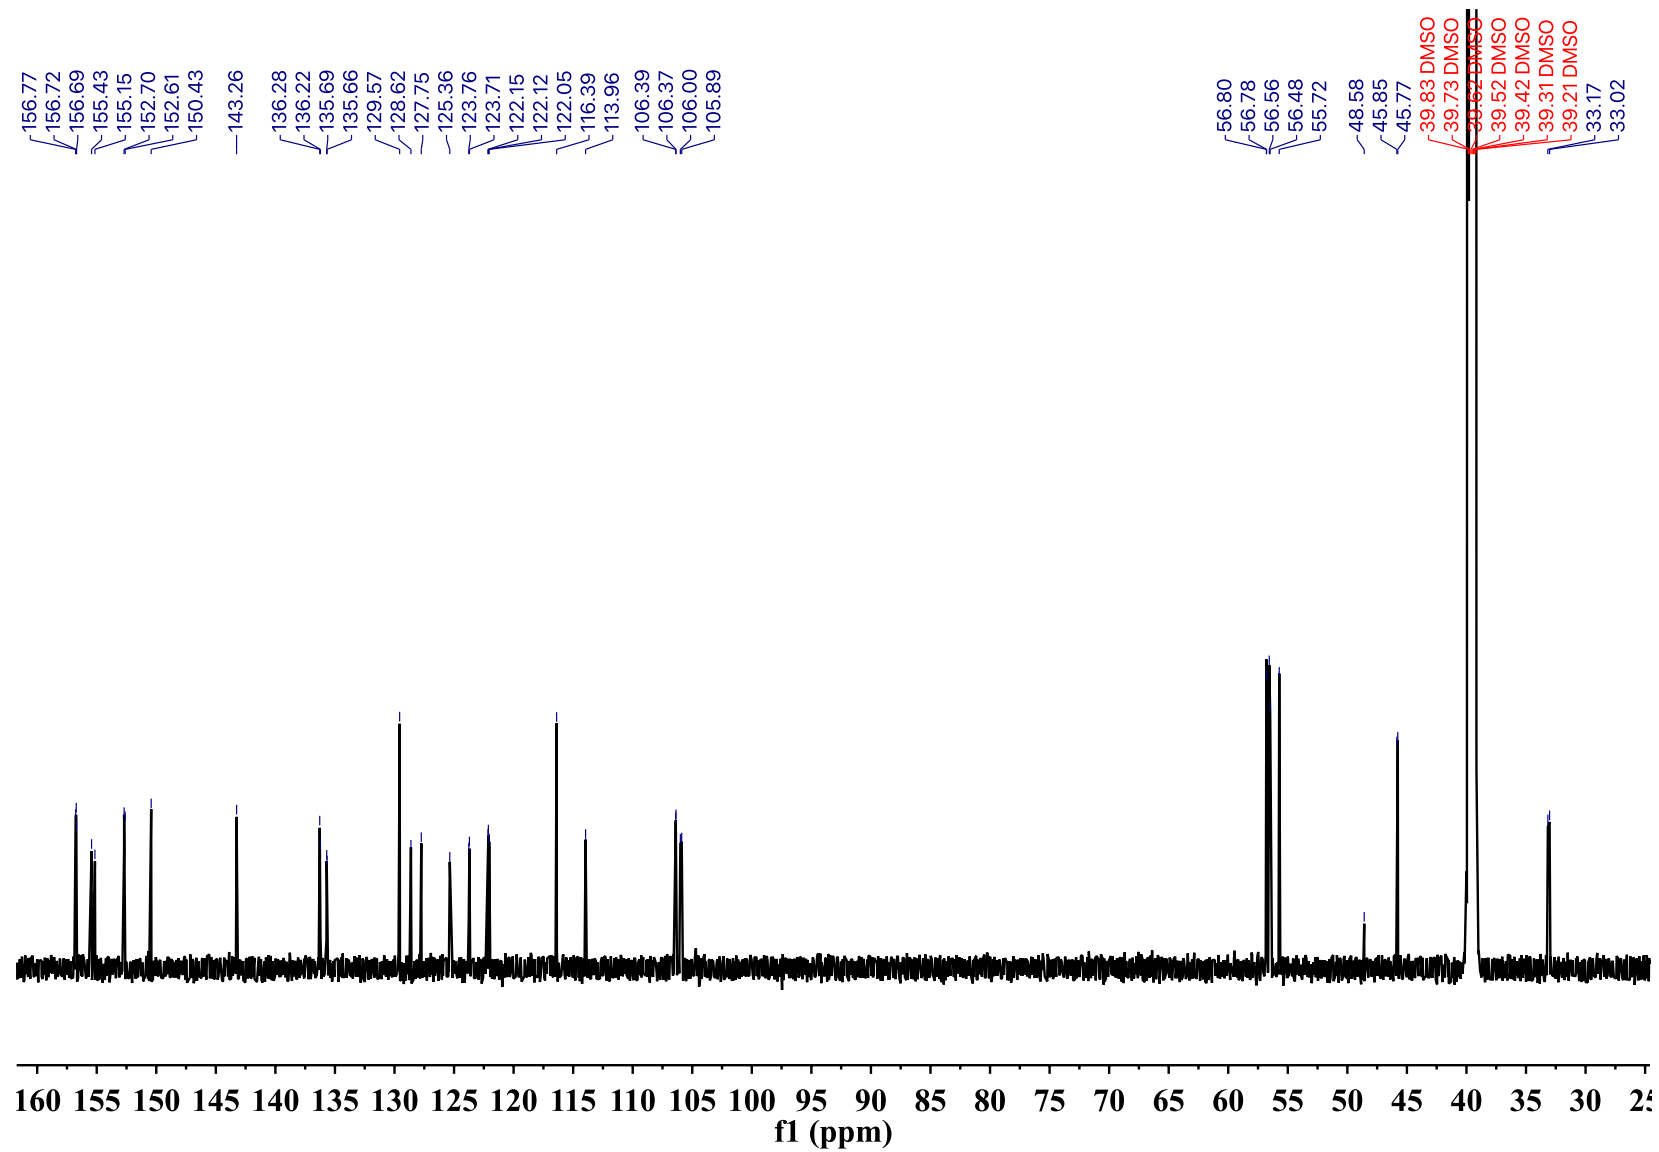

Figure S2.  $^{13}\text{C}$  NMR spectrum of phaeantharine trifluoroacetate (1)

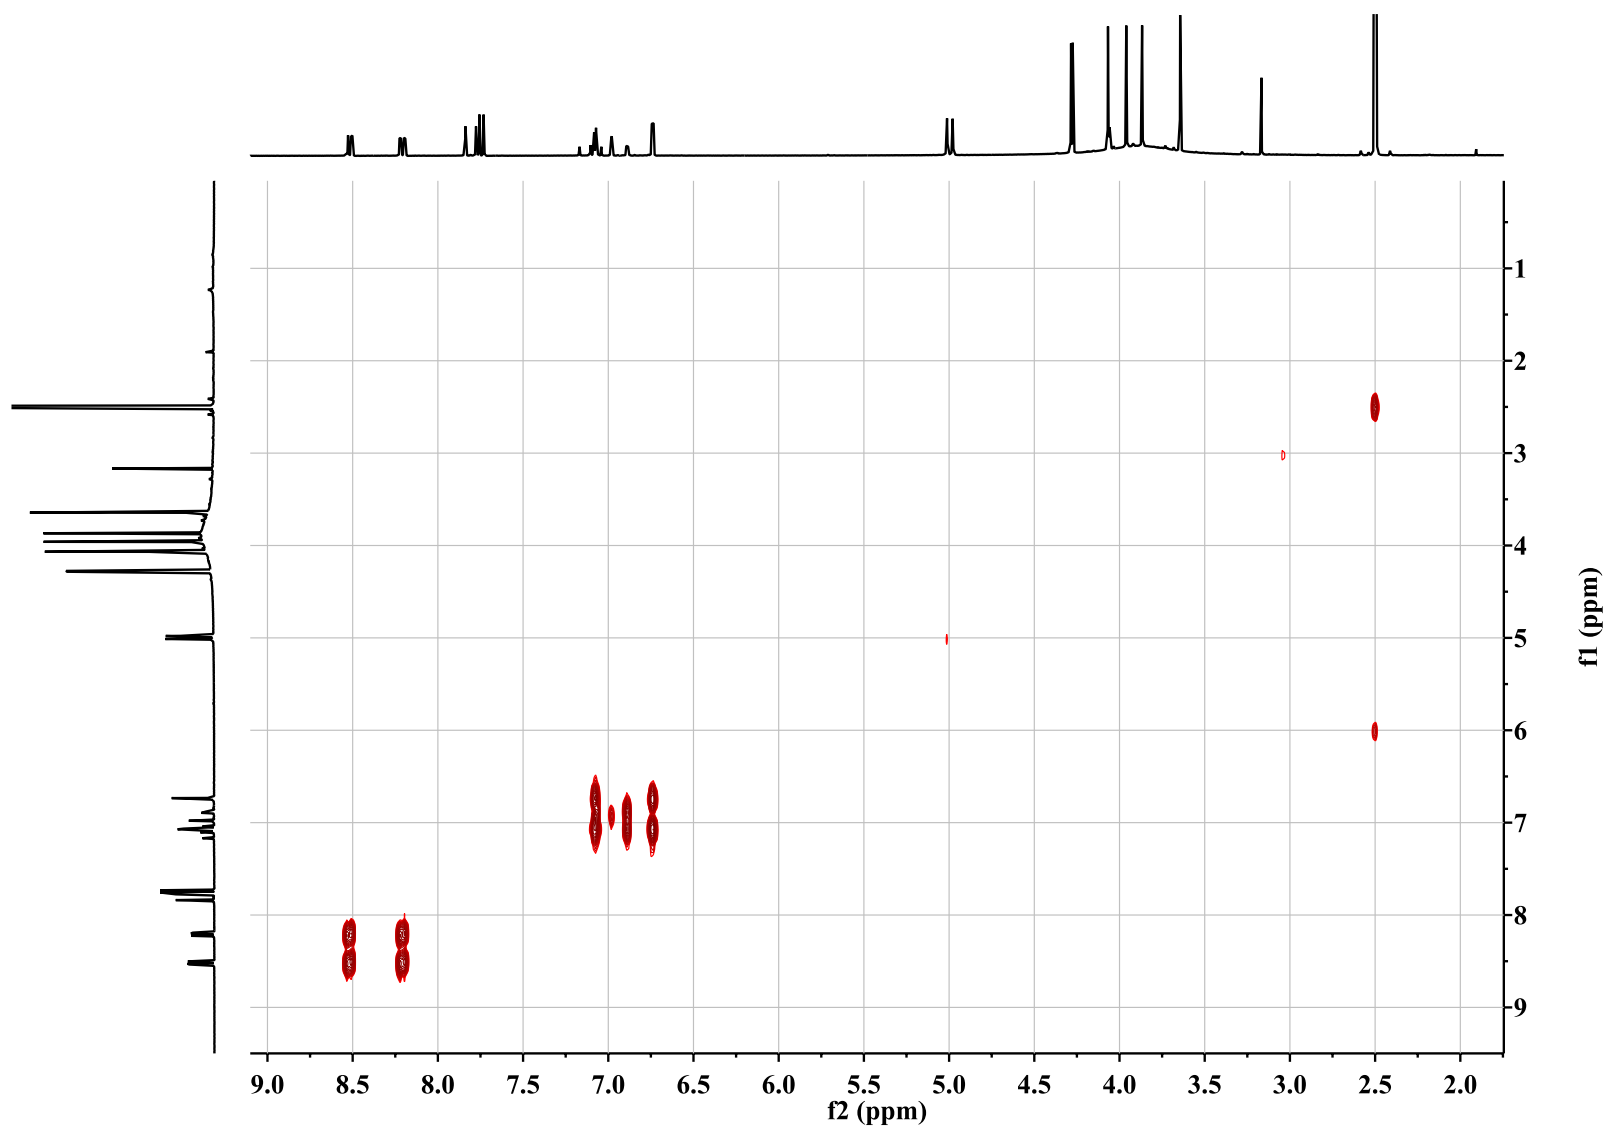

Figure S3. COSY NMR spectrum of phaeantharine trifluoroacetate (1)

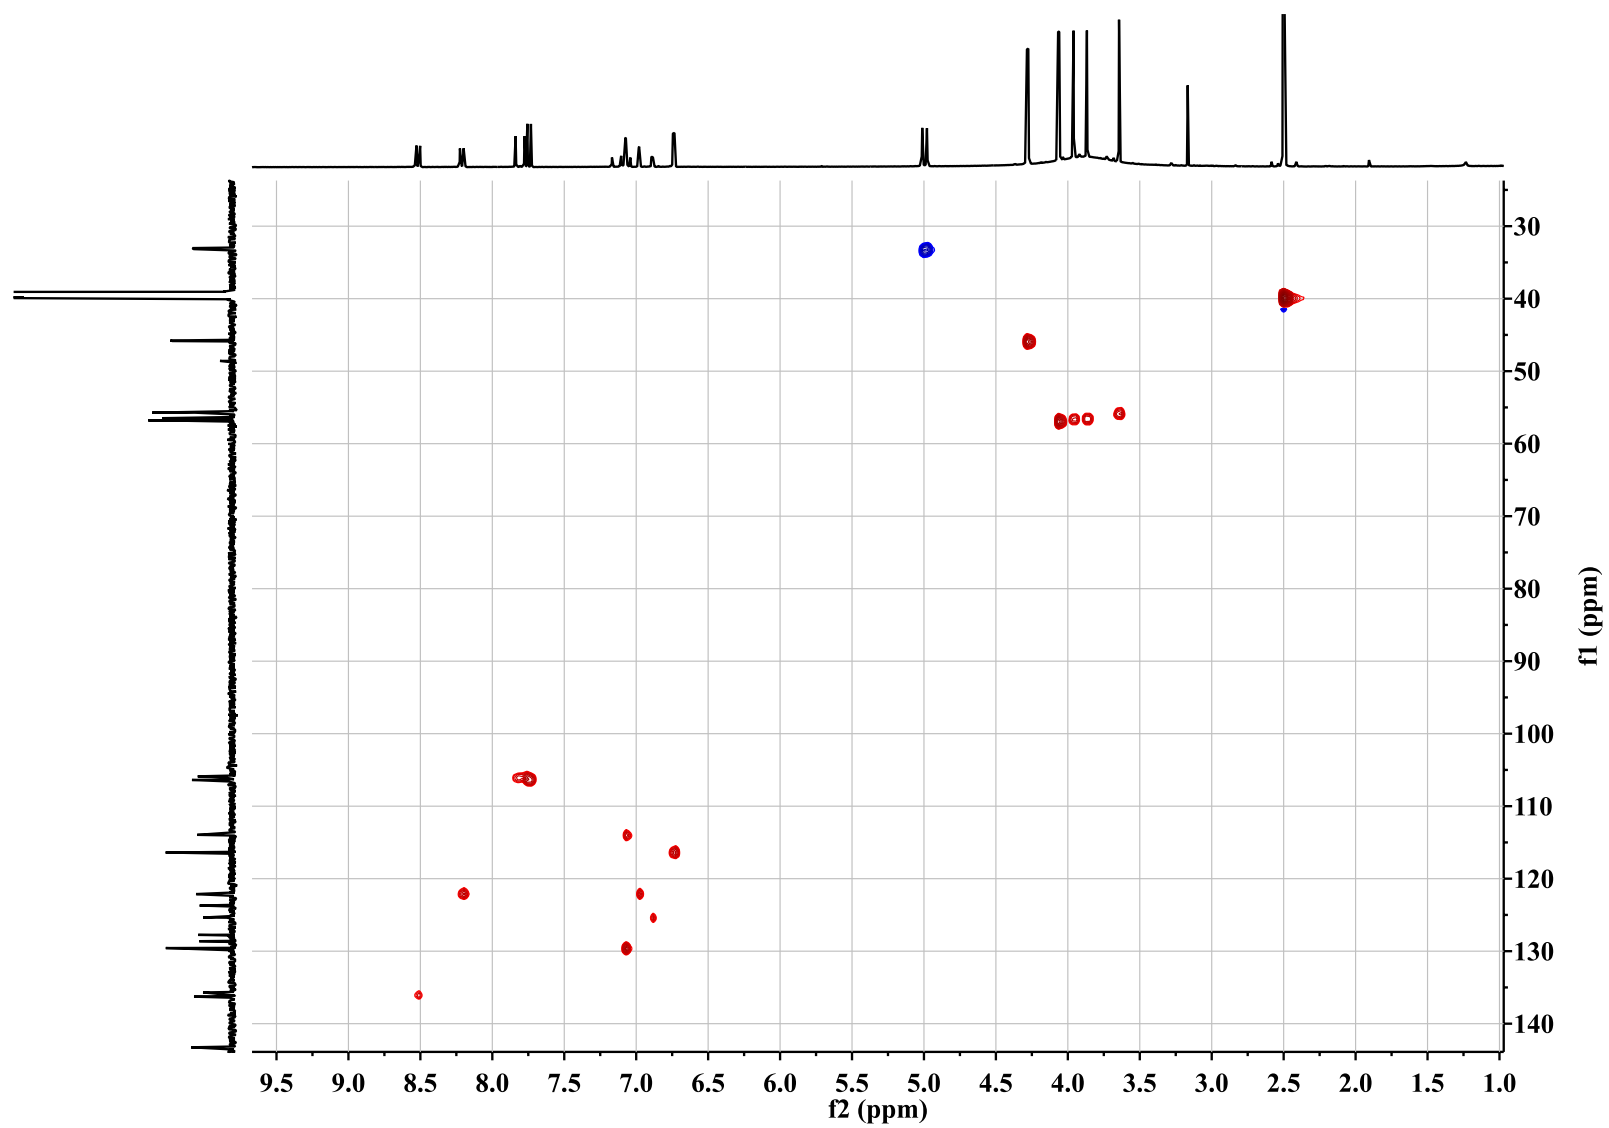

Figure S4. HSQC NMR spectrum of phaeantharine trifluoroacetate (1)

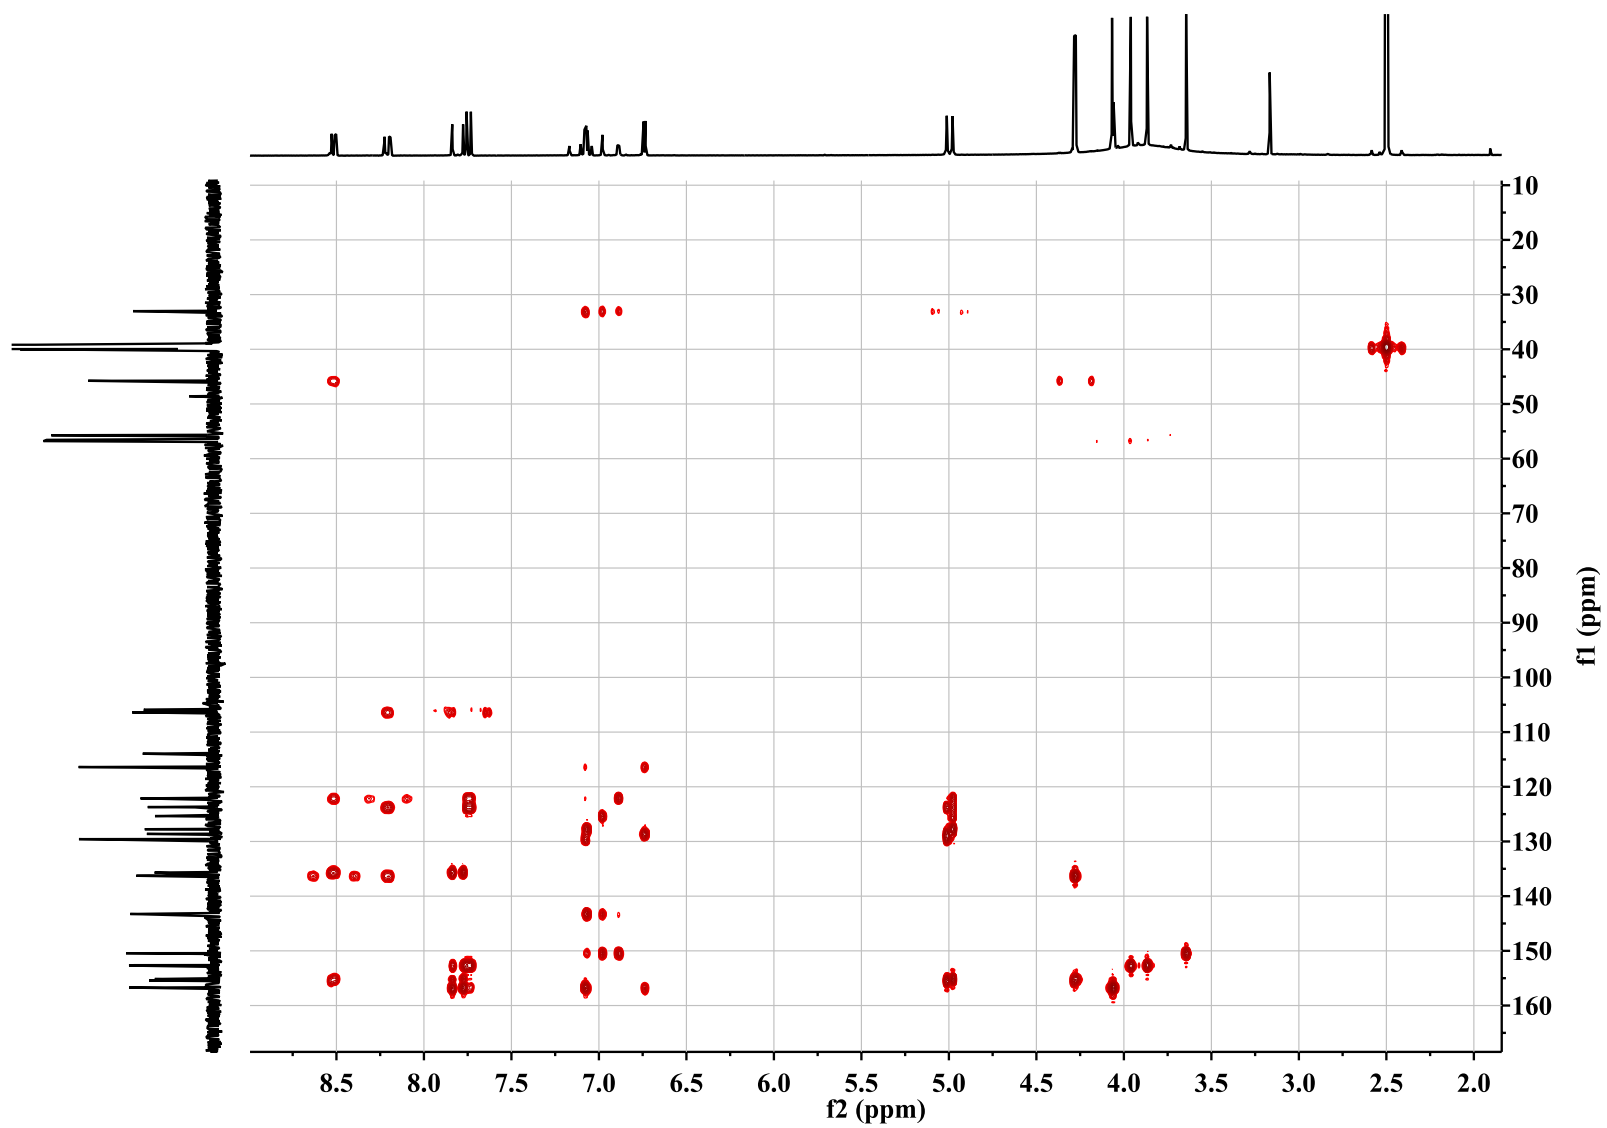

Figure S5. HMBC NMR spectrum of phaeantharine trifluoroacetate (1)



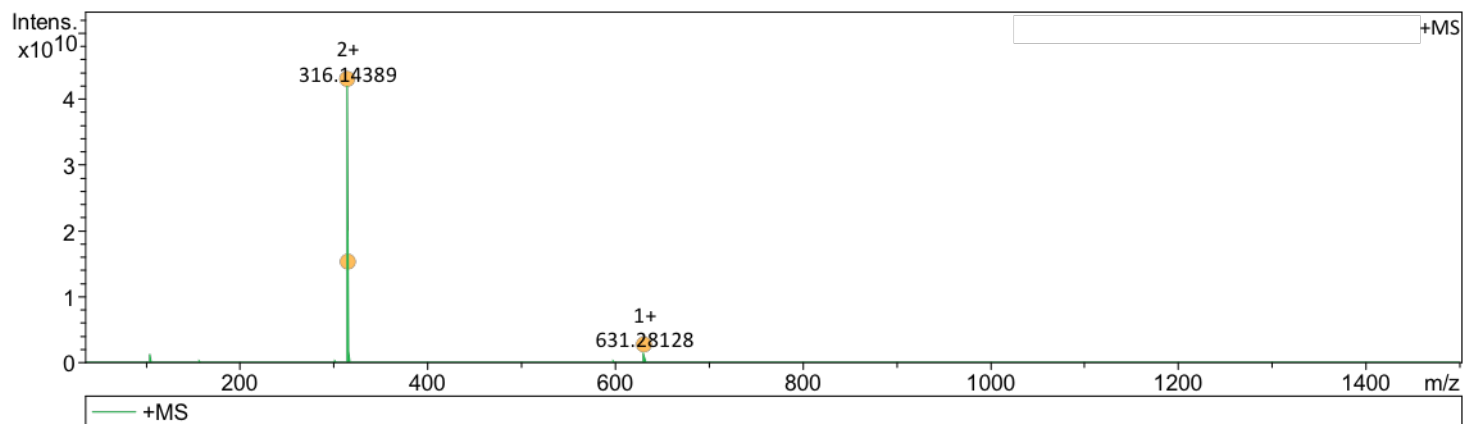

| Means. m/z | Ion formula                                                   | calc. m/z  | err [ppm] | rdB  | e <sup>-</sup> Conf | N-Rule |
|------------|---------------------------------------------------------------|------------|-----------|------|---------------------|--------|
| 316.143891 | C <sub>39</sub> H <sub>40</sub> N <sub>2</sub> O <sub>6</sub> | 316.143770 | -0.4      | 22.0 | even                | ok     |
| 631.281278 | C <sub>39</sub> H <sub>39</sub> N <sub>2</sub> O <sub>6</sub> | 631.280263 | -1.6      | 22.0 | even                | ok     |

**Figure S6.** HRMS spectrum of trifluoroacetate phaeantharine (**1**)

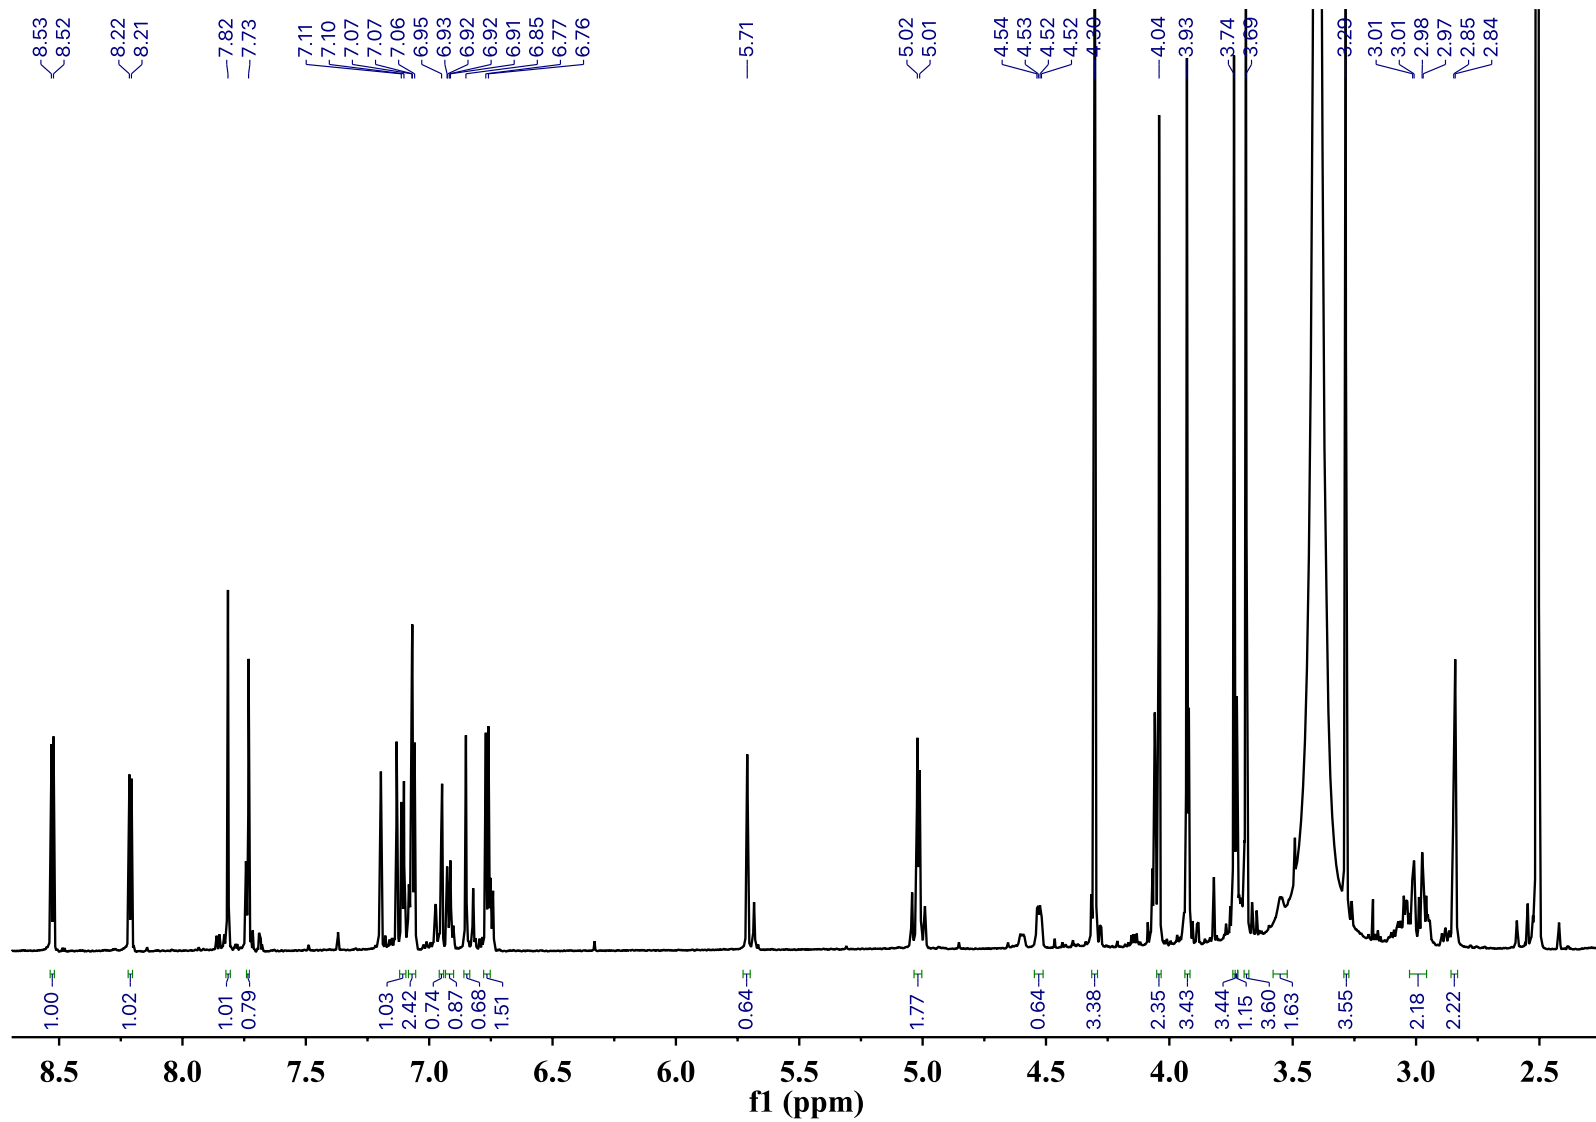

Figure S7.  $^1\text{H}$  NMR spectrum of (*R*)-nomimantharine trifluoroacetate (**2**)

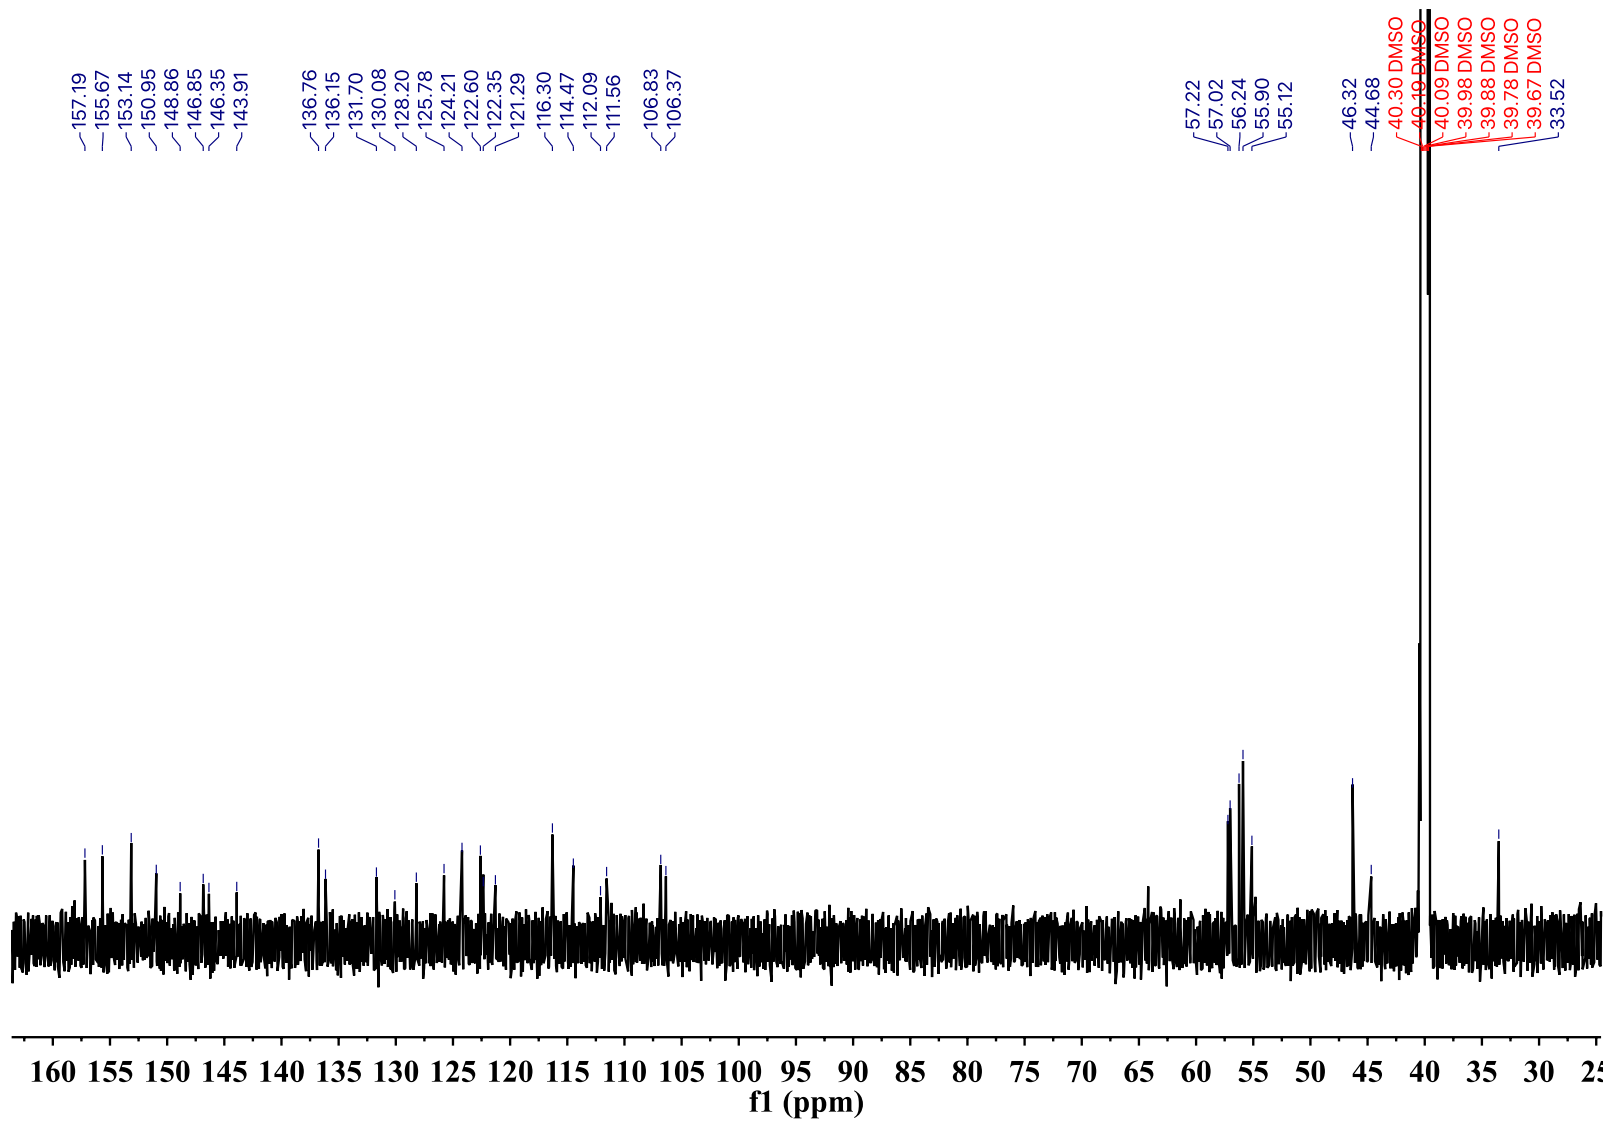

Figure S8. <sup>13</sup>C NMR spectrum of (*R*)-nomimantharine trifluoroacetate (2)

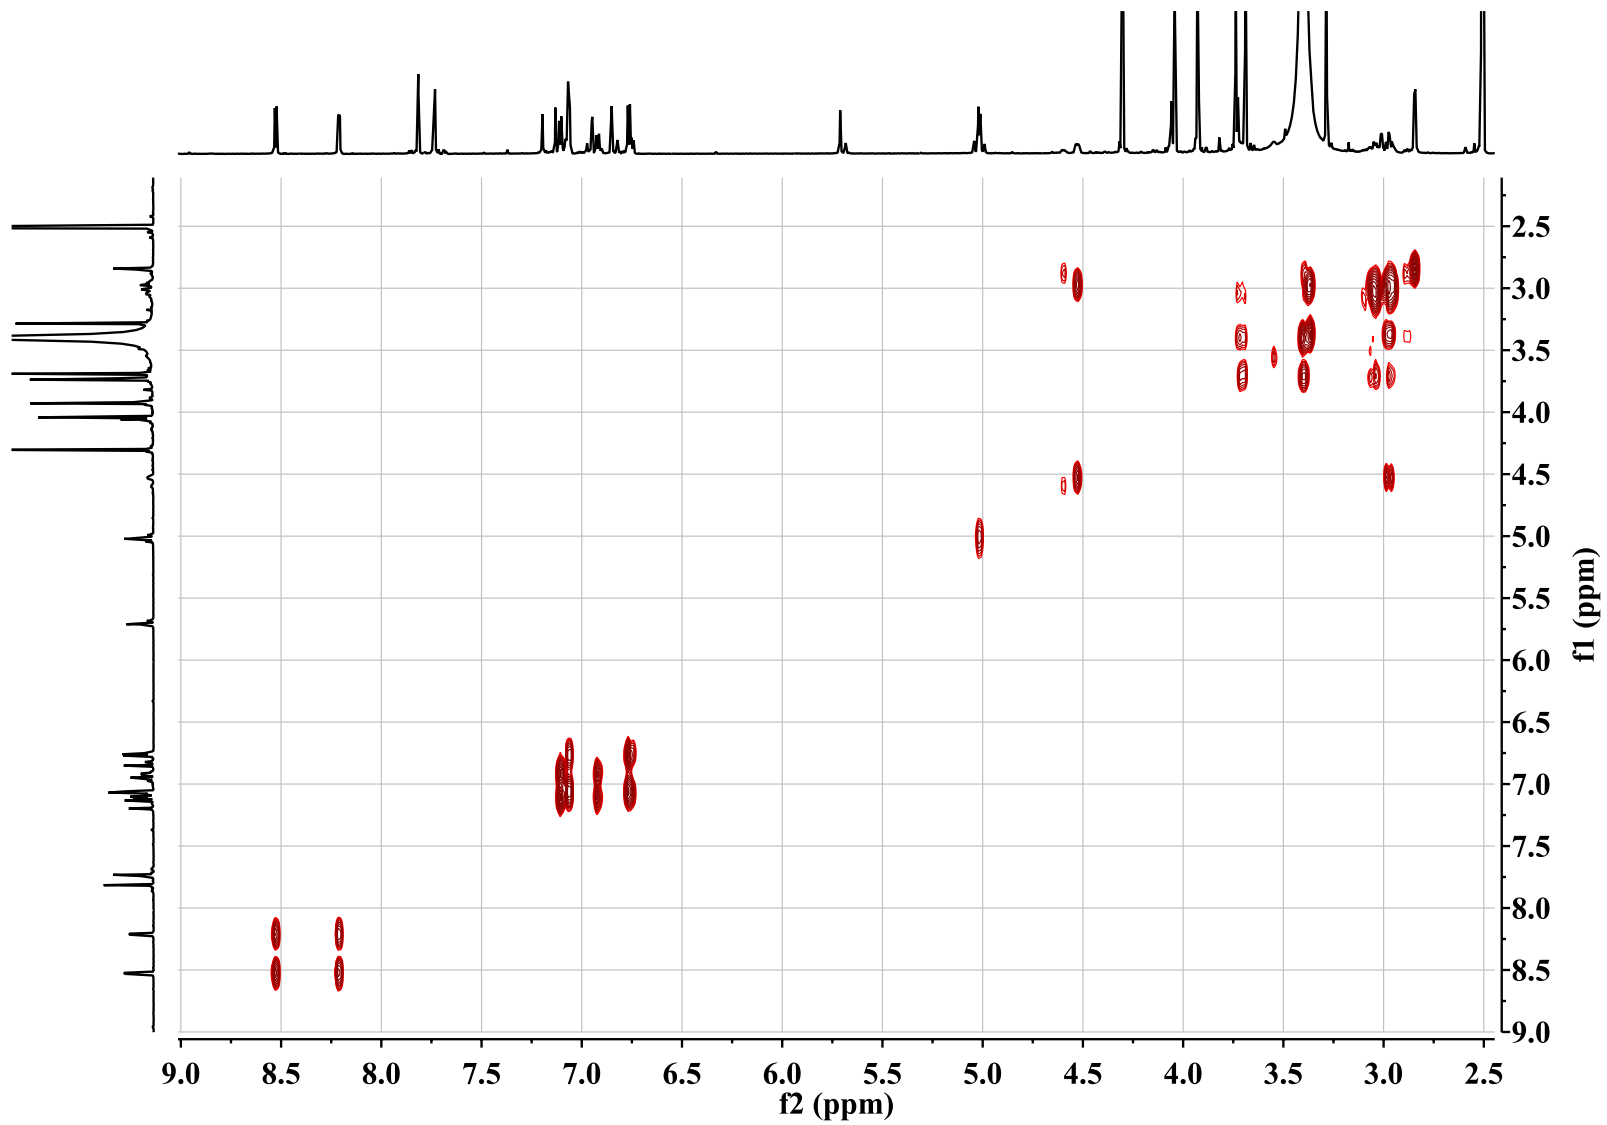

Figure S9. COSY NMR spectrum of (*R*)-nomimantharine trifluoroacetate (2)

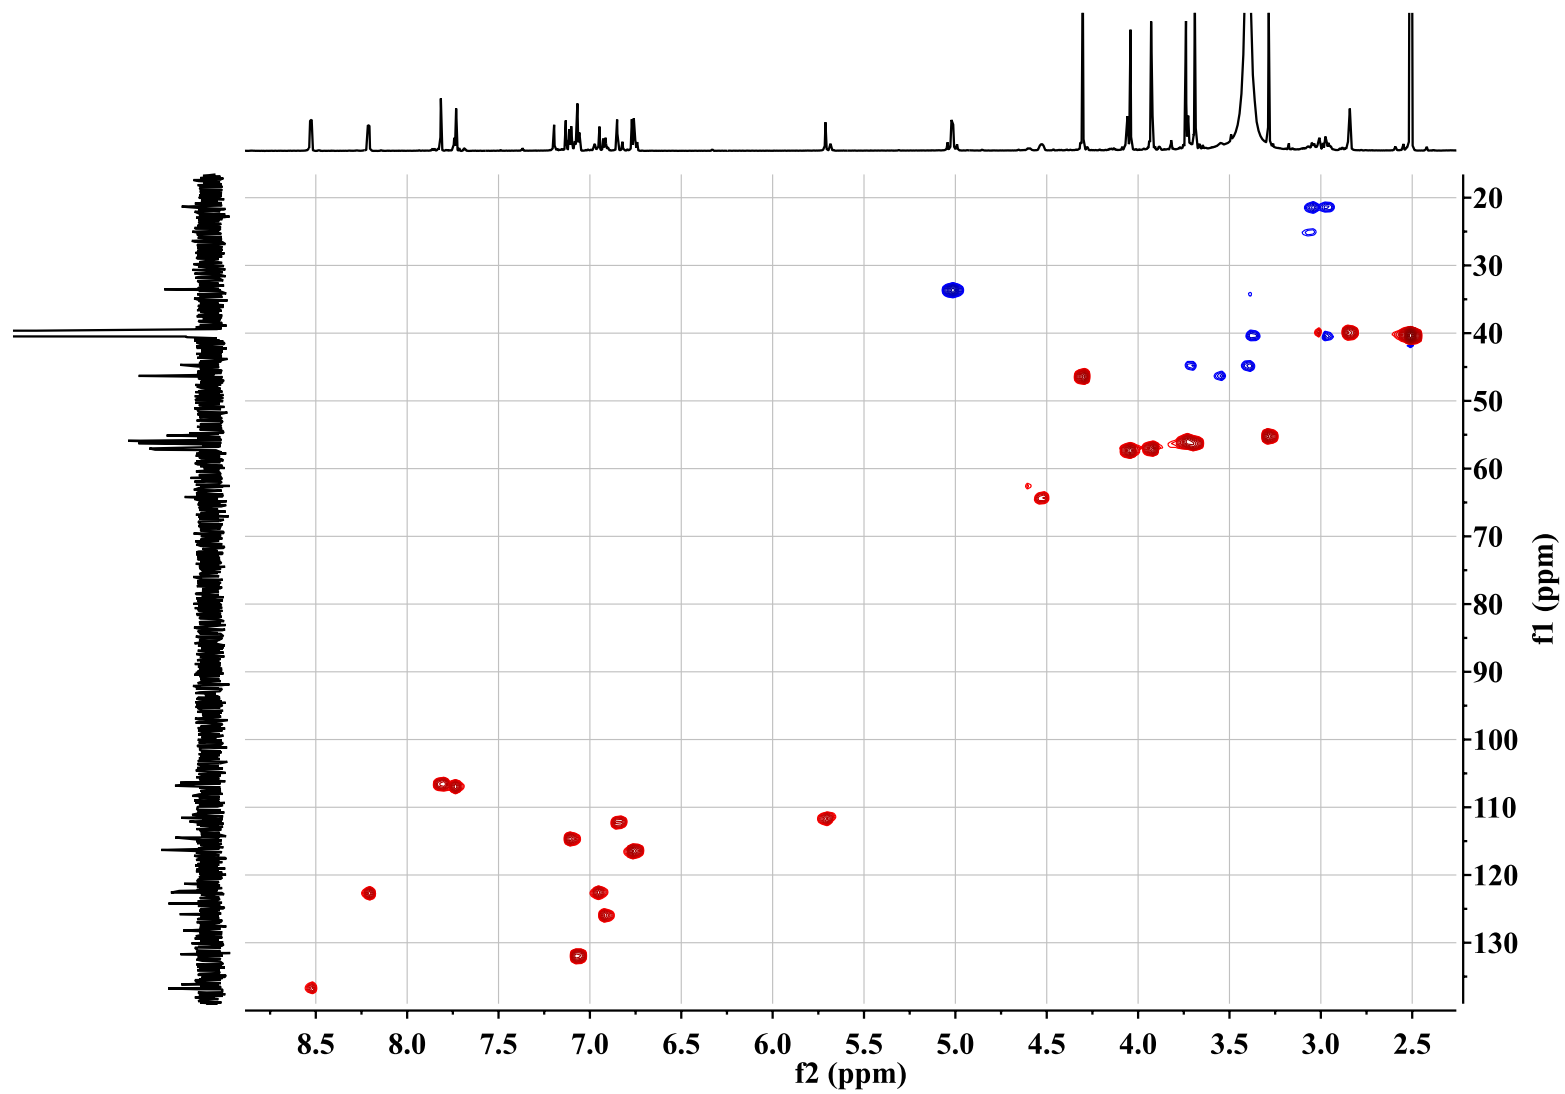

Figure S10. HSQC NMR spectrum of (*R*)-nomimantharine trifluoroacetate (**2**)

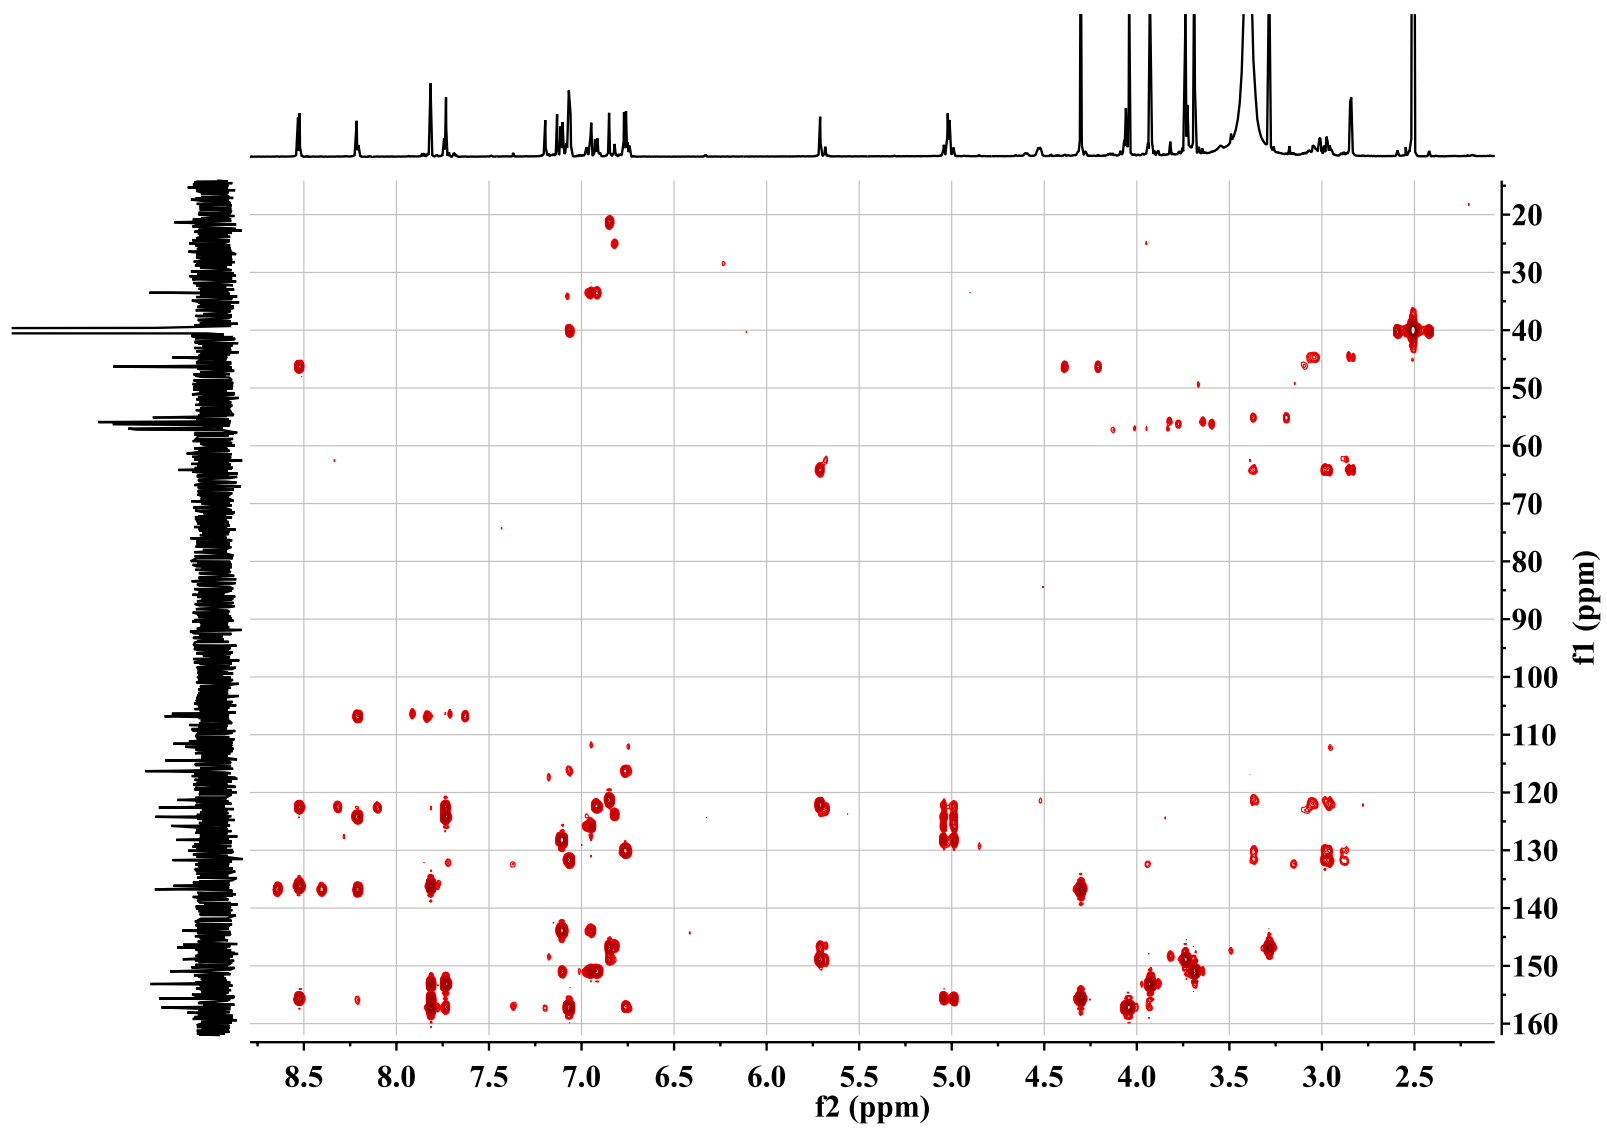

Figure S11. HMBC NMR spectrum of (*R*)-nomimantharine trifluoroacetate (2)

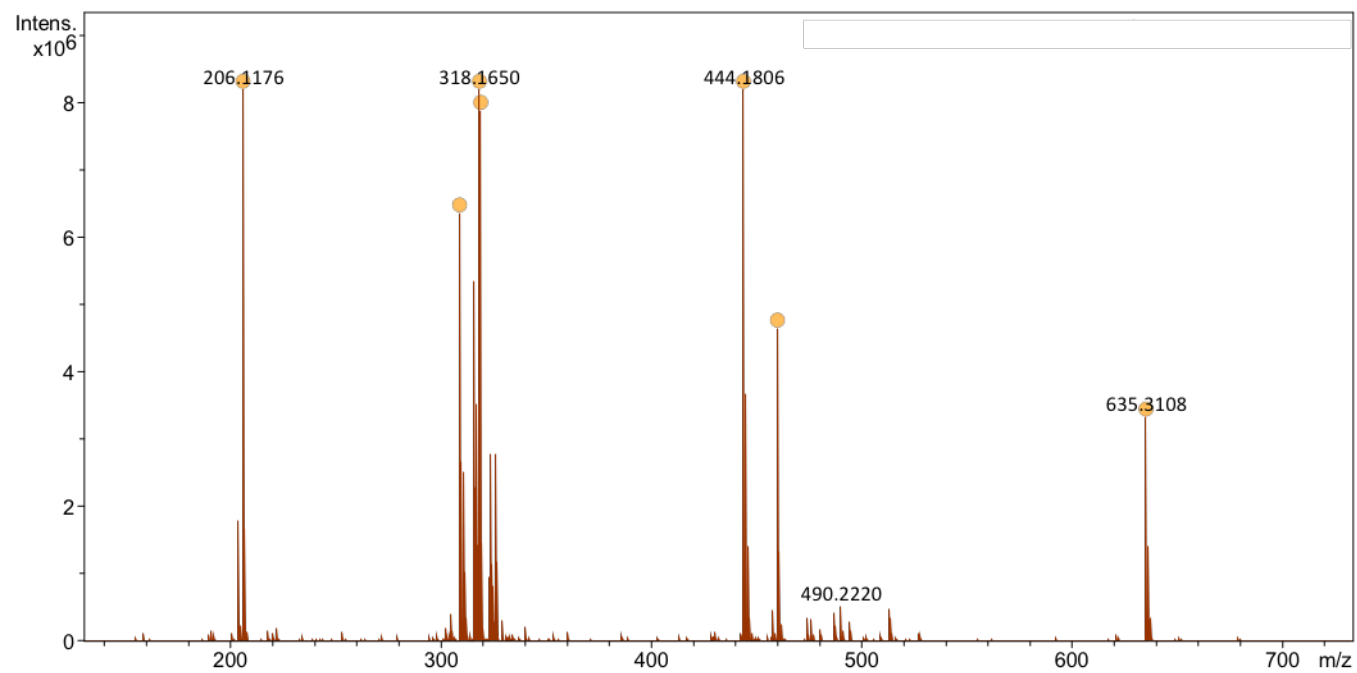

| Means. m/z | Ion formula                                                   | calc. m/z | err [ppm] | rdb  | e <sup>-</sup> Conf | N-Rule |
|------------|---------------------------------------------------------------|-----------|-----------|------|---------------------|--------|
| 635.3108   | C <sub>39</sub> H <sub>43</sub> N <sub>2</sub> O <sub>6</sub> | 635.3116  | 1.2       | 19.5 | even                | ok     |

**Figure S12.** HRMS spectrum of (*R*)-nomimantharine trifluoroacetate (**2**)

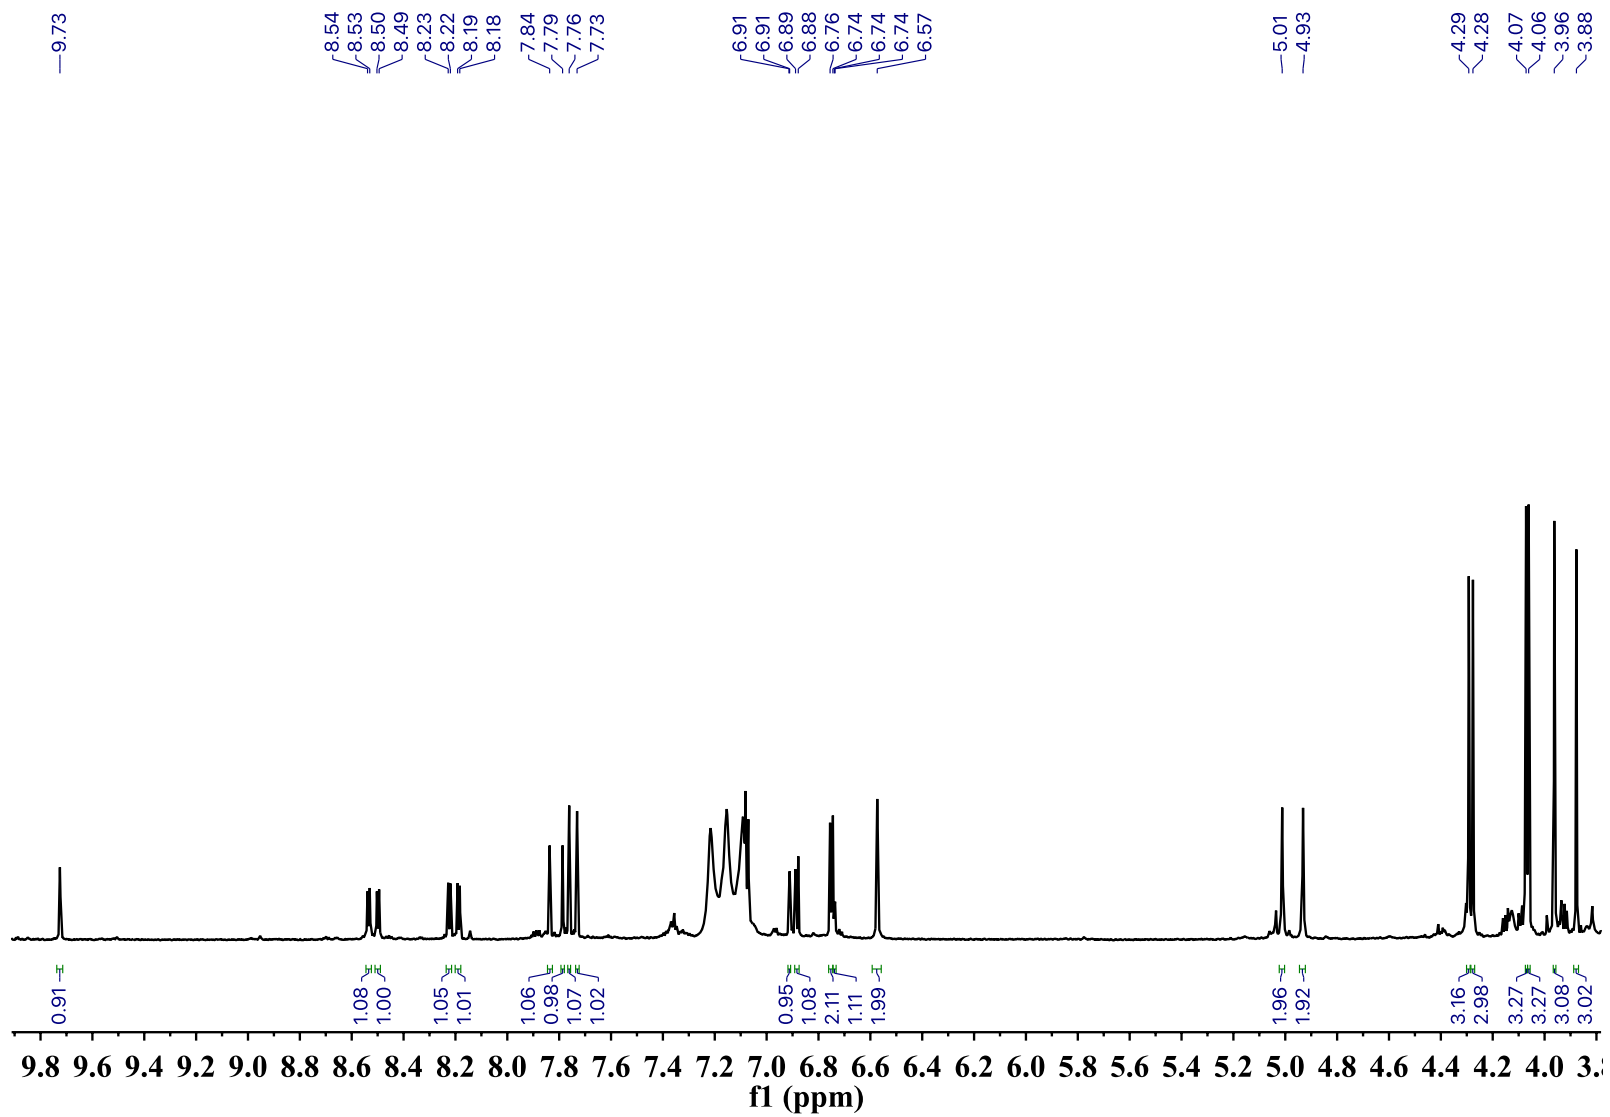

**Figure S13.**  $^1\text{H}$  NMR spectrum of 12-de-*O*-methyphaeantharine trifluoroacetate (3)



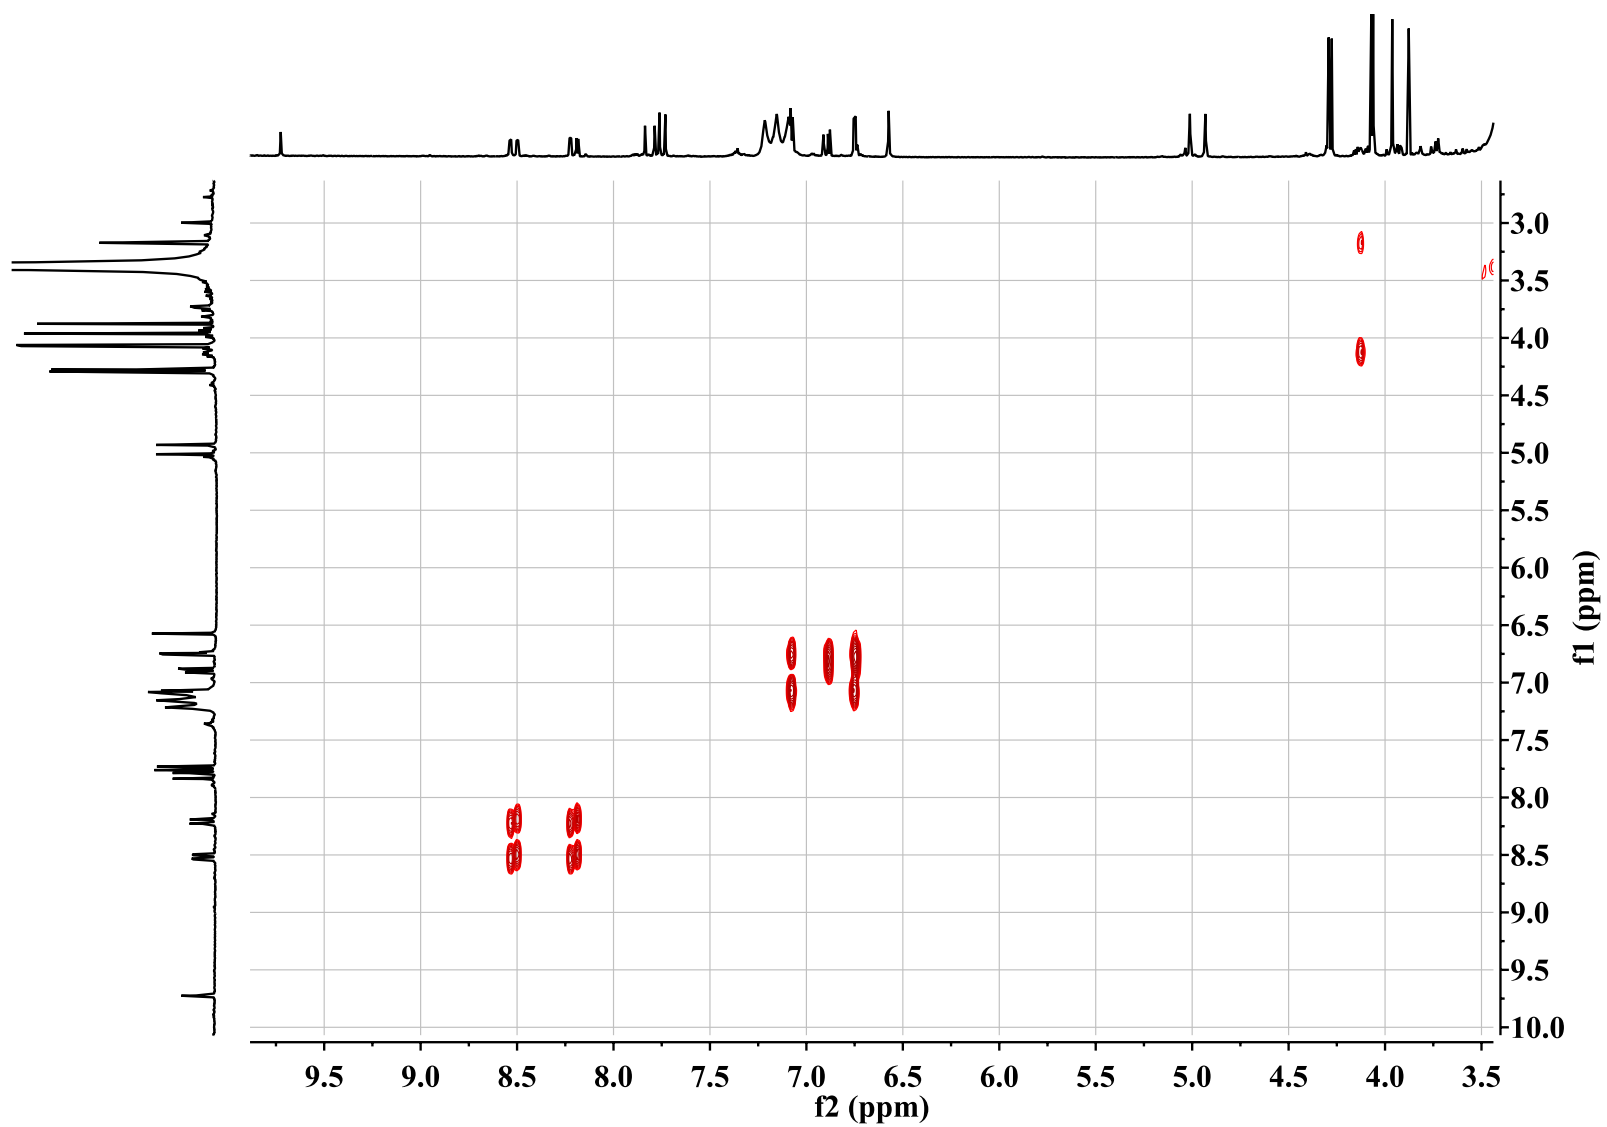

Figure S14. COSY NMR spectrum of 12-de-*O*-methylphaeantharine trifluoroacetate (**3**)

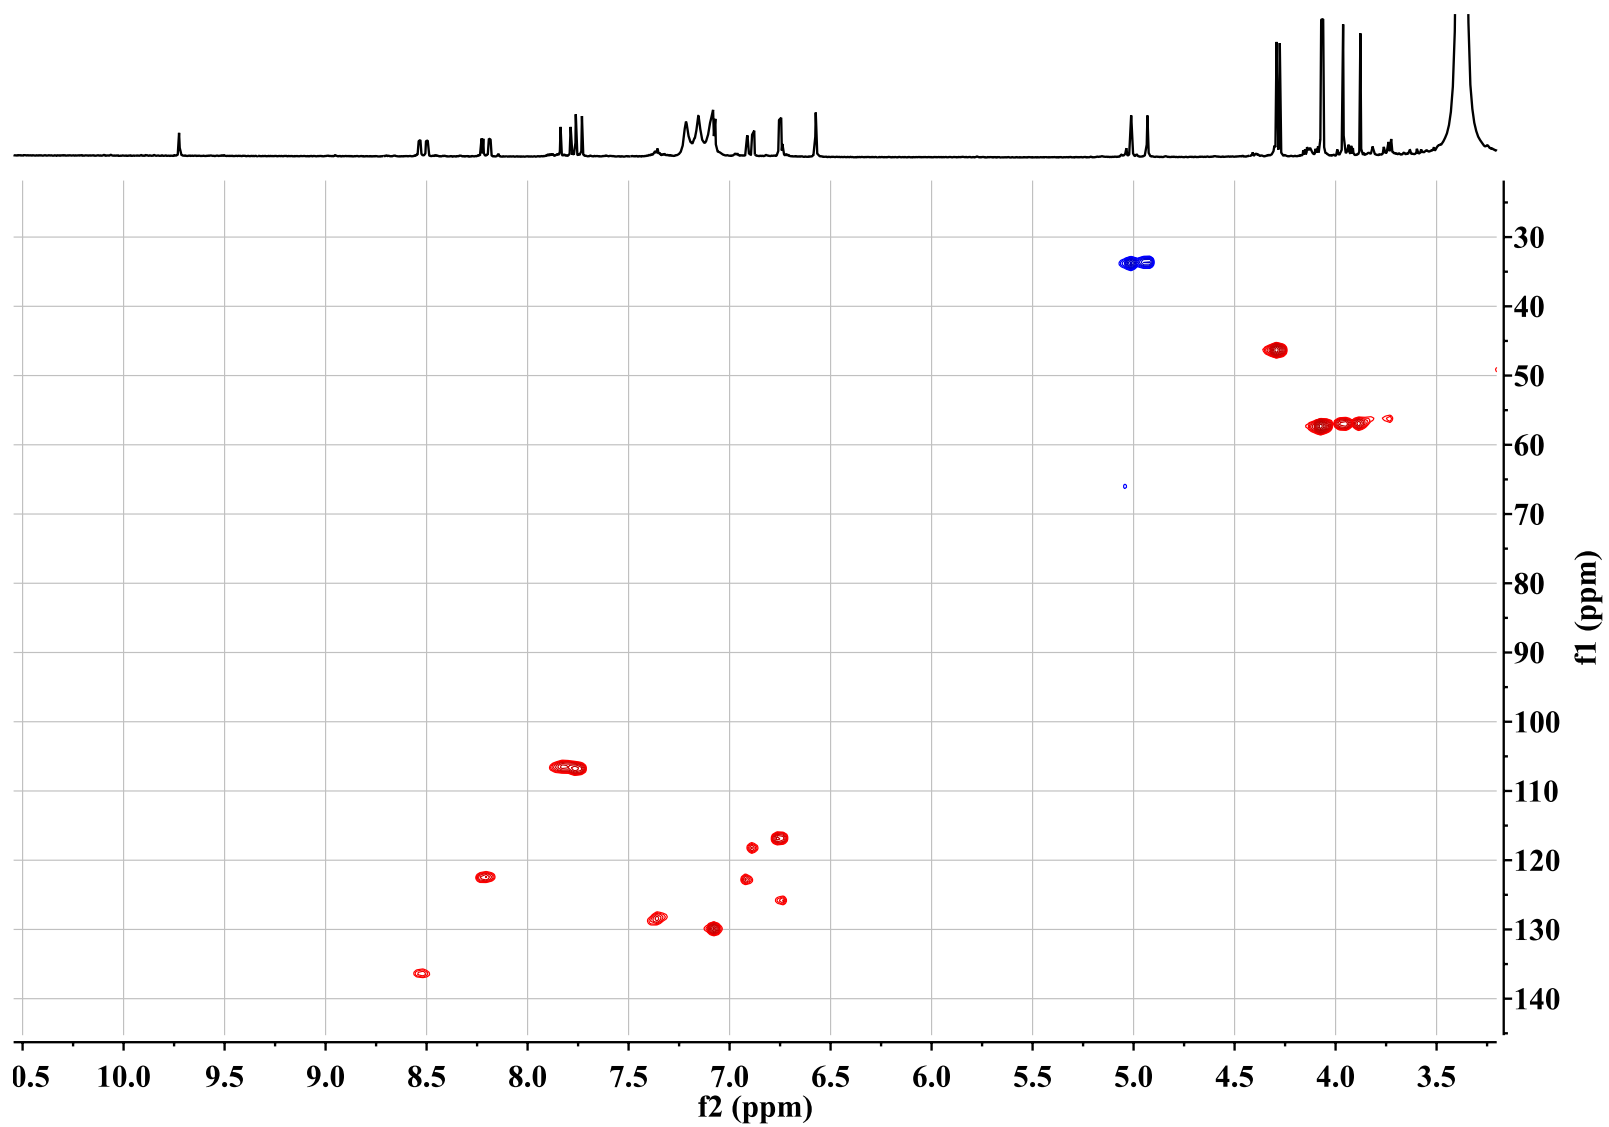

Figure S15. HSQC NMR spectrum of 12-de-*O*-methylphaeantharine trifluoroacetate (3)



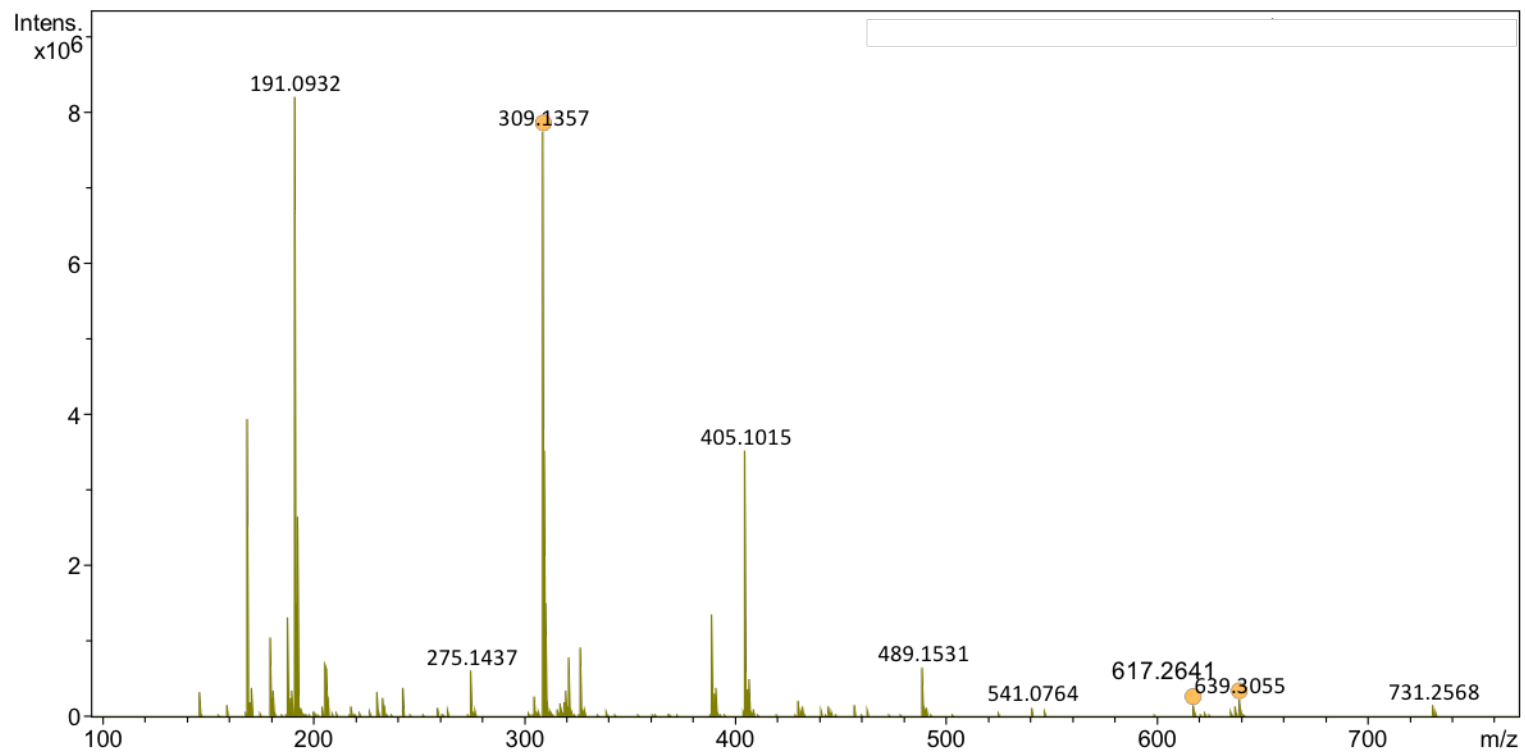

| Means. m/z | Ion formula                                                   | calc. m/z | err [ppm] | rdb  | e <sup>-</sup> Conf | N-Rule |
|------------|---------------------------------------------------------------|-----------|-----------|------|---------------------|--------|
| 309.1357   | C <sub>38</sub> H <sub>38</sub> N <sub>2</sub> O <sub>6</sub> | 309.1359  | 0.6       | 21.0 | even                | ok     |
| 617.2641   | C <sub>38</sub> H <sub>37</sub> N <sub>2</sub> O <sub>6</sub> | 617.2646  | -1.6      | 21.5 | even                | ok     |

**Figure S17.** HRMS spectrum of 12-de-*O*-methylphaeantharine trifluoroacetate (**3**)

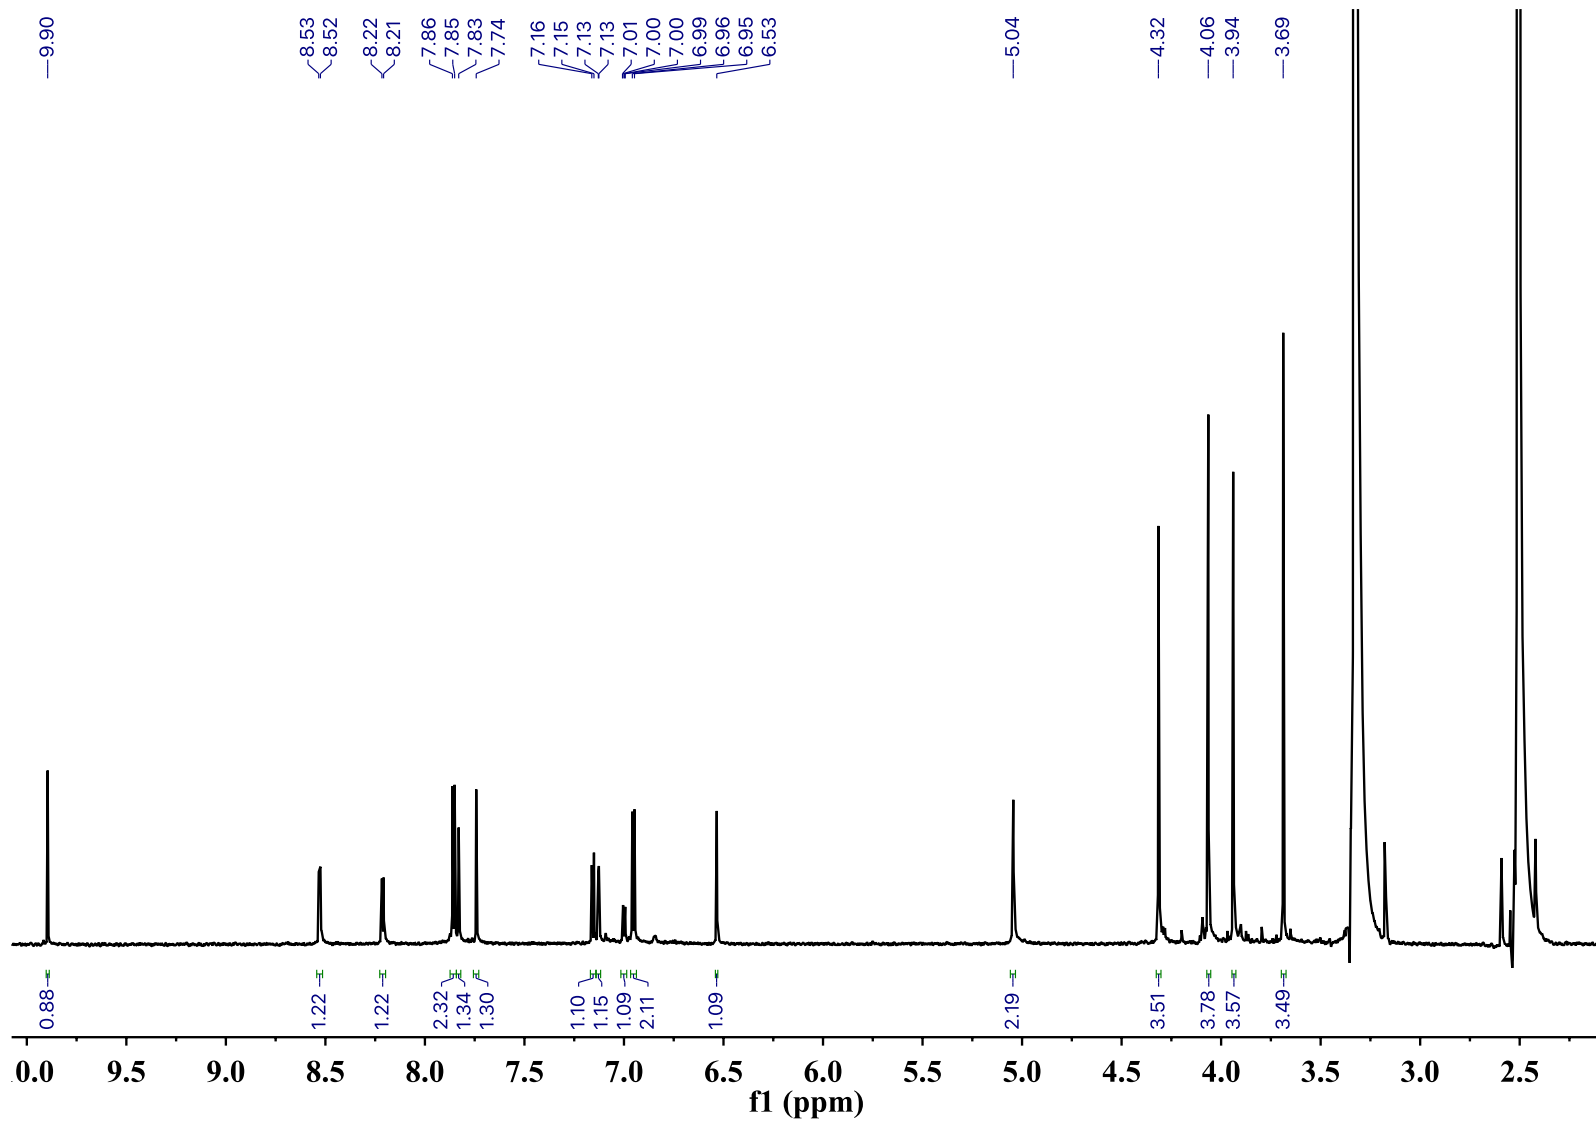

Figure S18.  $^1\text{H}$  NMR spectrum of nominanthral trifluoroacetate (4)

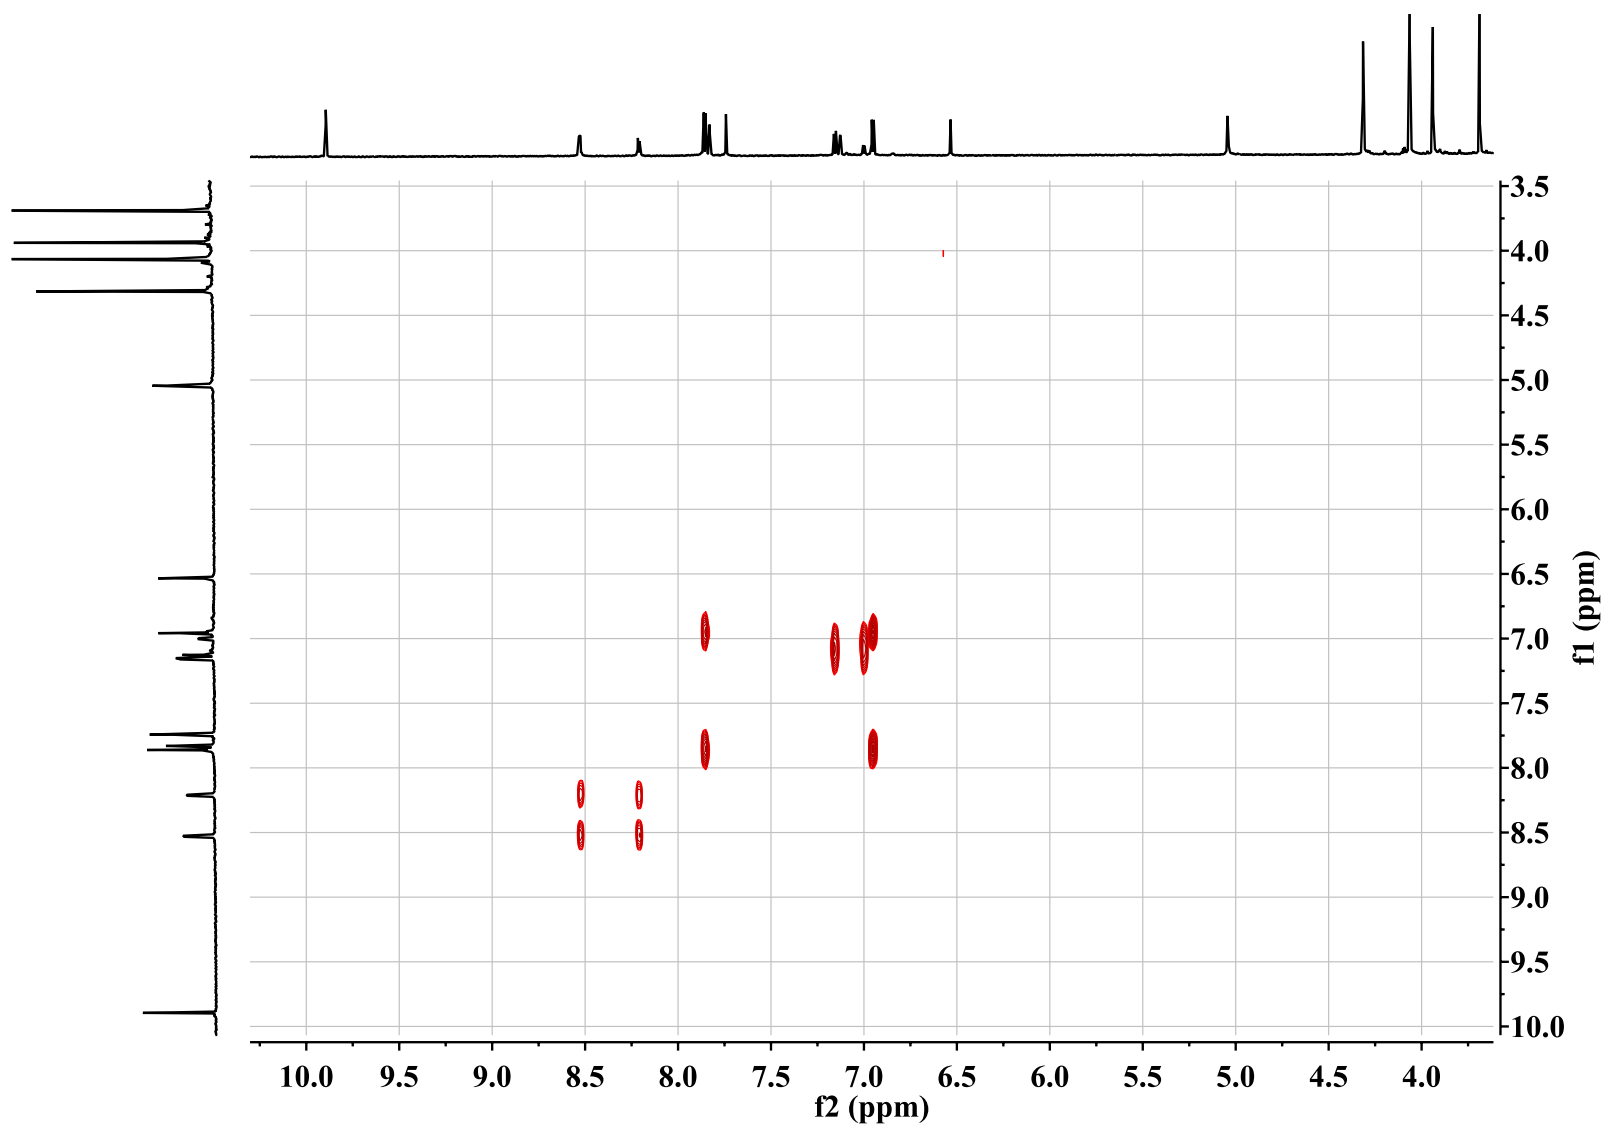

Figure S19. COSY NMR spectrum of nomenclanthranal trifluoroacetate (4)

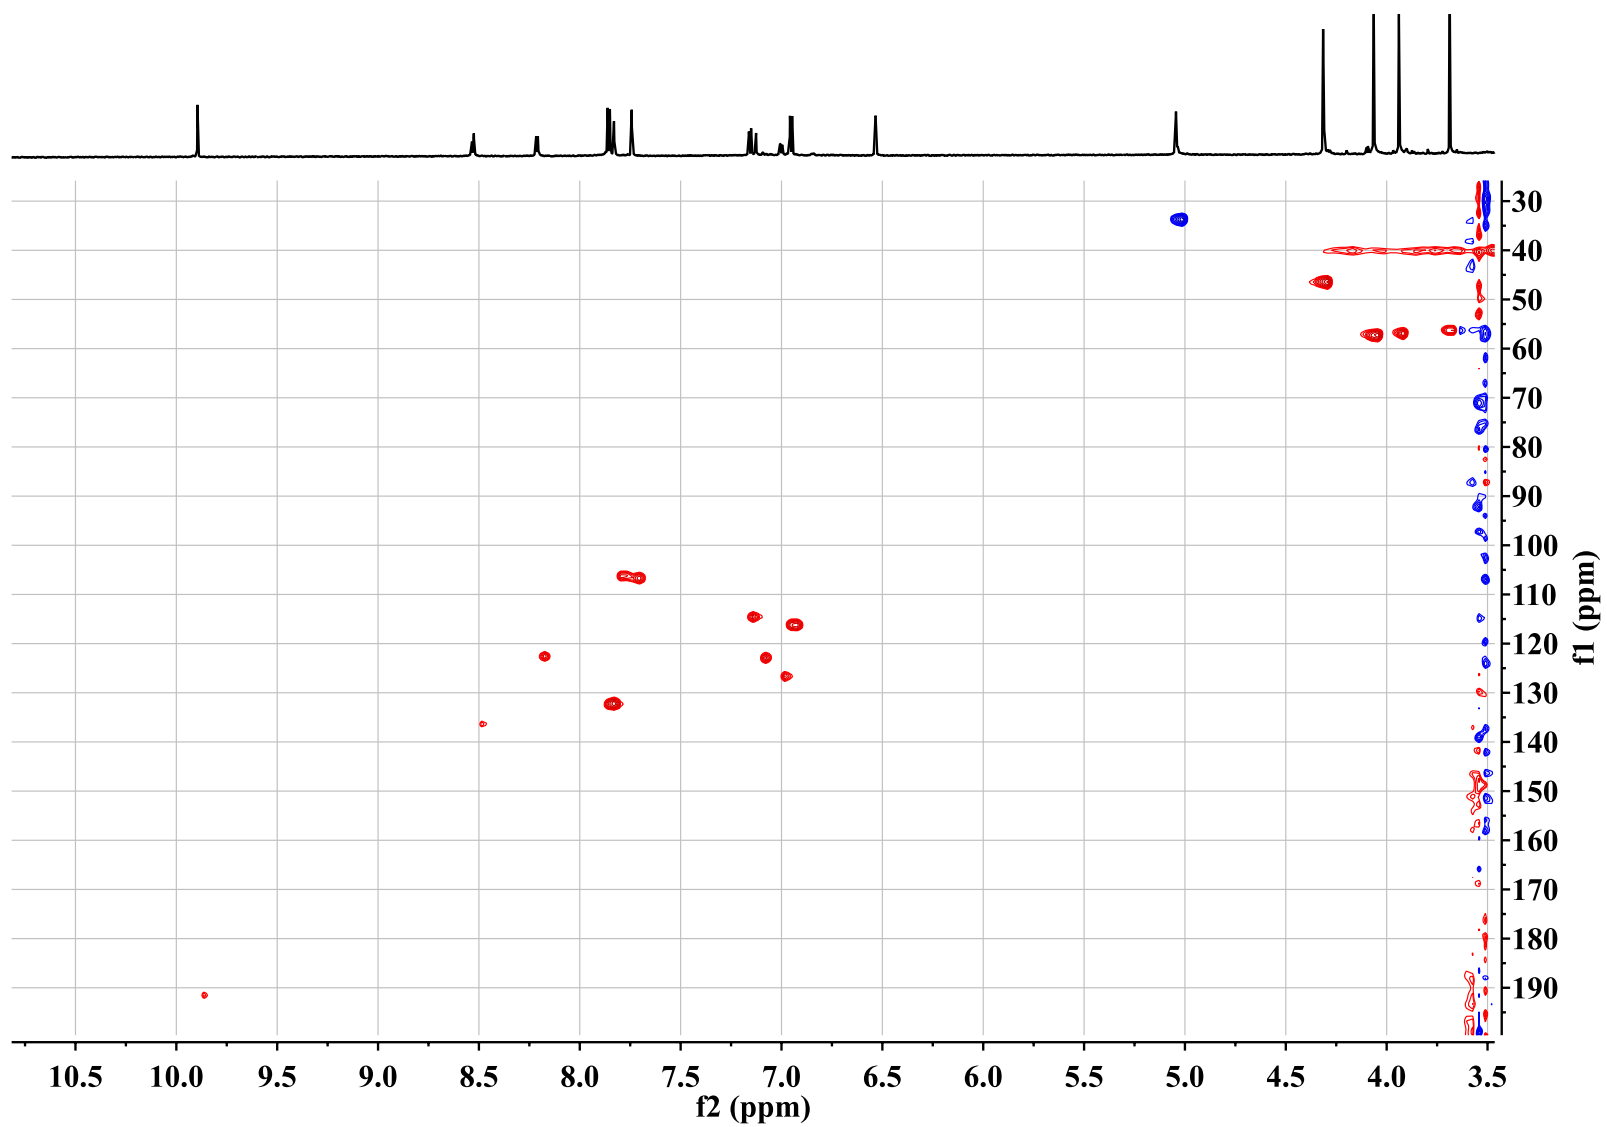

Figure S19. HSQC NMR spectrum of nomenclanthranal trifluoroacetate (4)

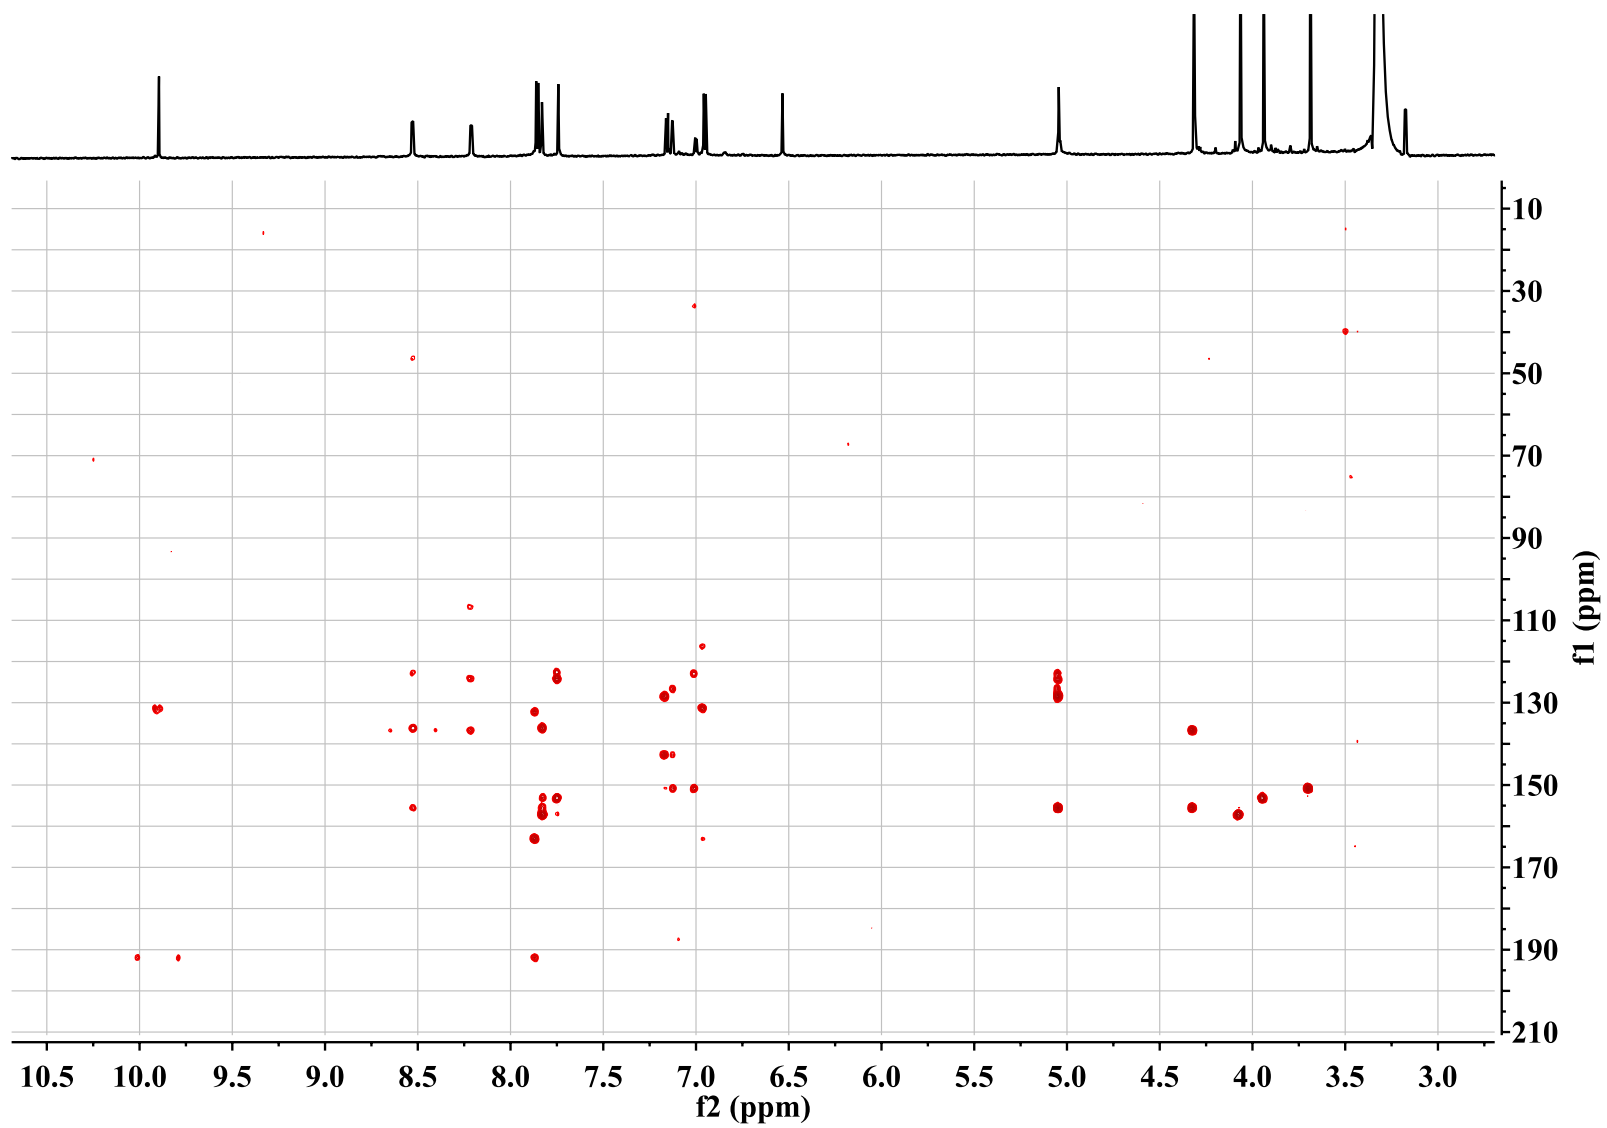

Figure S20. HMBC NMR spectrum of nominanthranal trifluoroacetate (4)



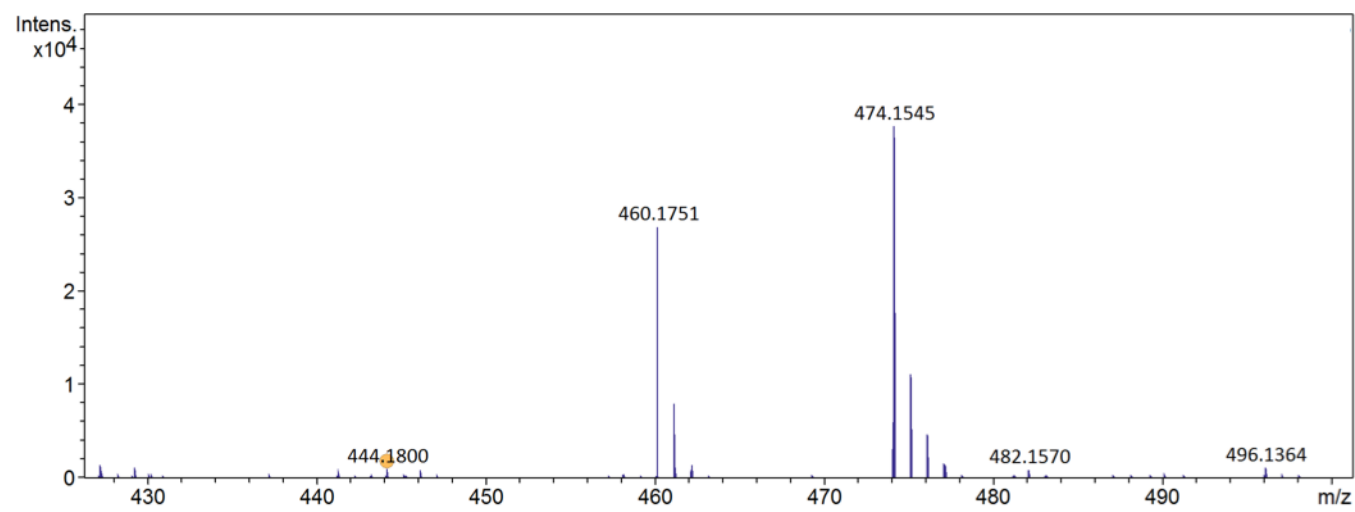

| Means. m/z | Ion formula                                     | calc. m/z | err [ppm] | rdb  | e-Conf | N-Rule |
|------------|-------------------------------------------------|-----------|-----------|------|--------|--------|
| 444.1800   | C <sub>27</sub> H <sub>26</sub> NO <sub>5</sub> | 444.1805  | 1.2       | 15.5 | even   | ok     |

**Figure S21.** HRMS spectrum of nominanthranal trifluoroacetate (4)

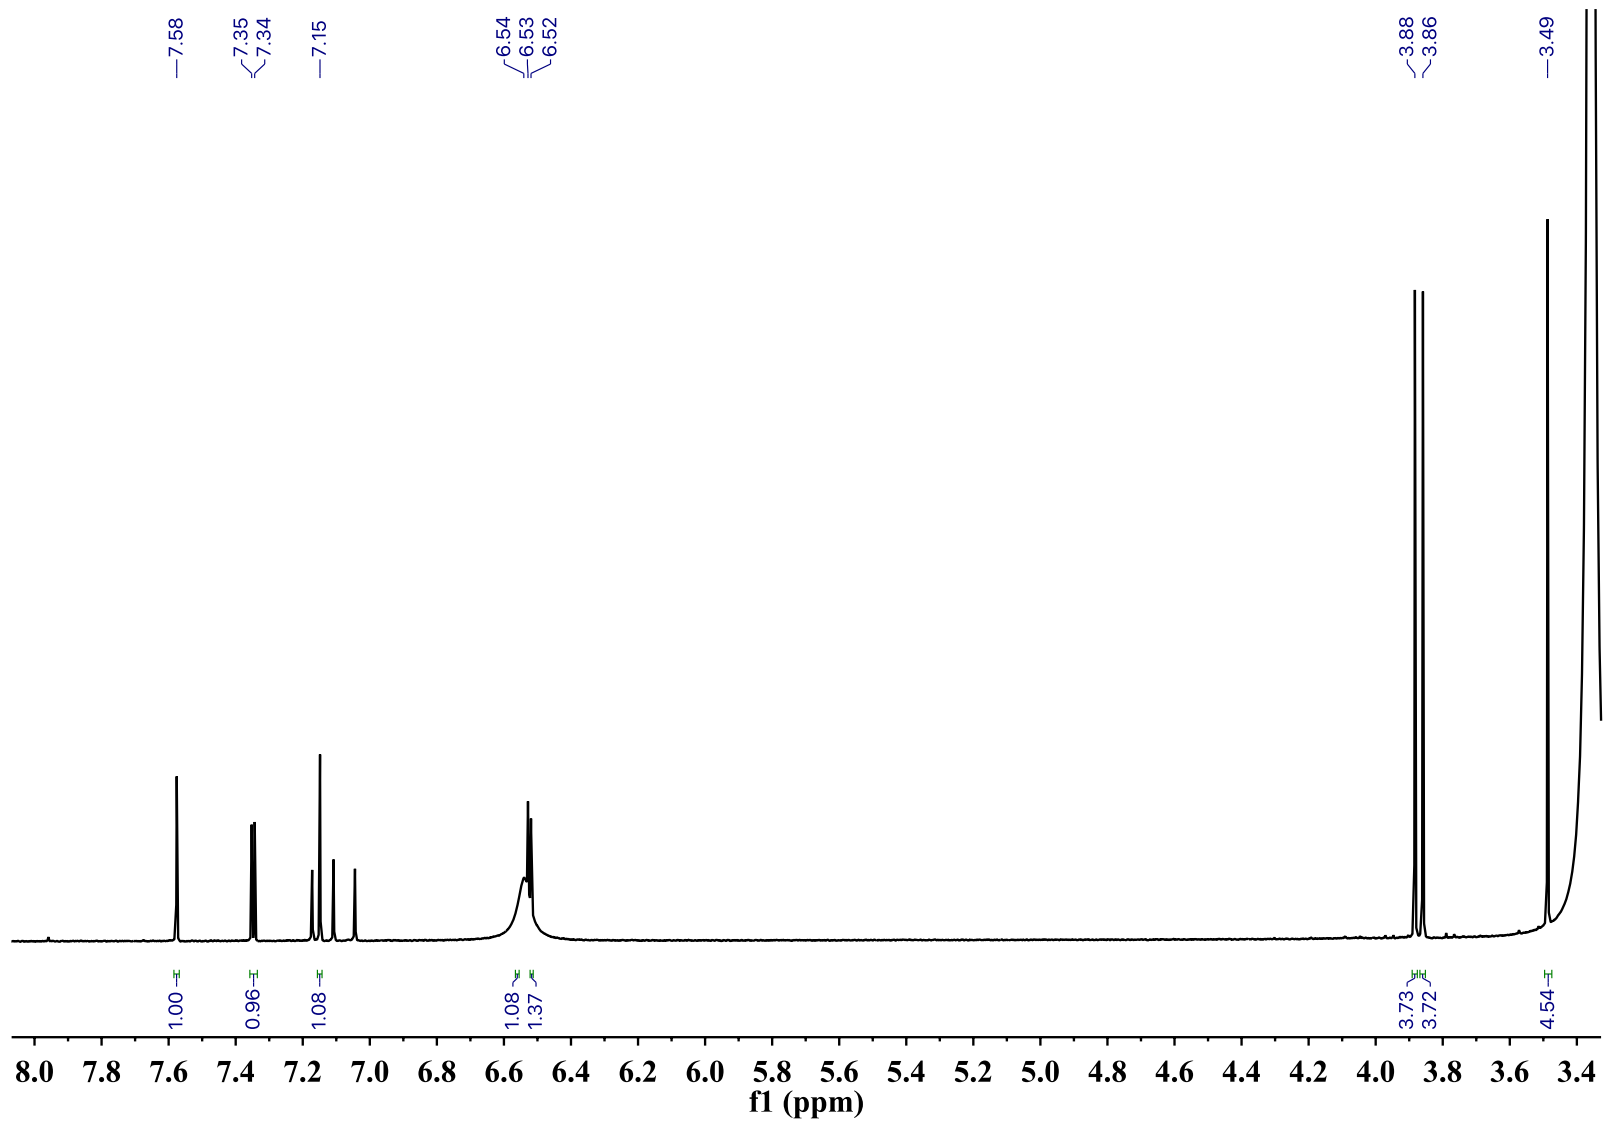

Figure S22. <sup>1</sup>H NMR spectrum of 1-hydroxy-6,7-dimethoxy-2-methylisoquinoline trifluoroacetate (**5**)

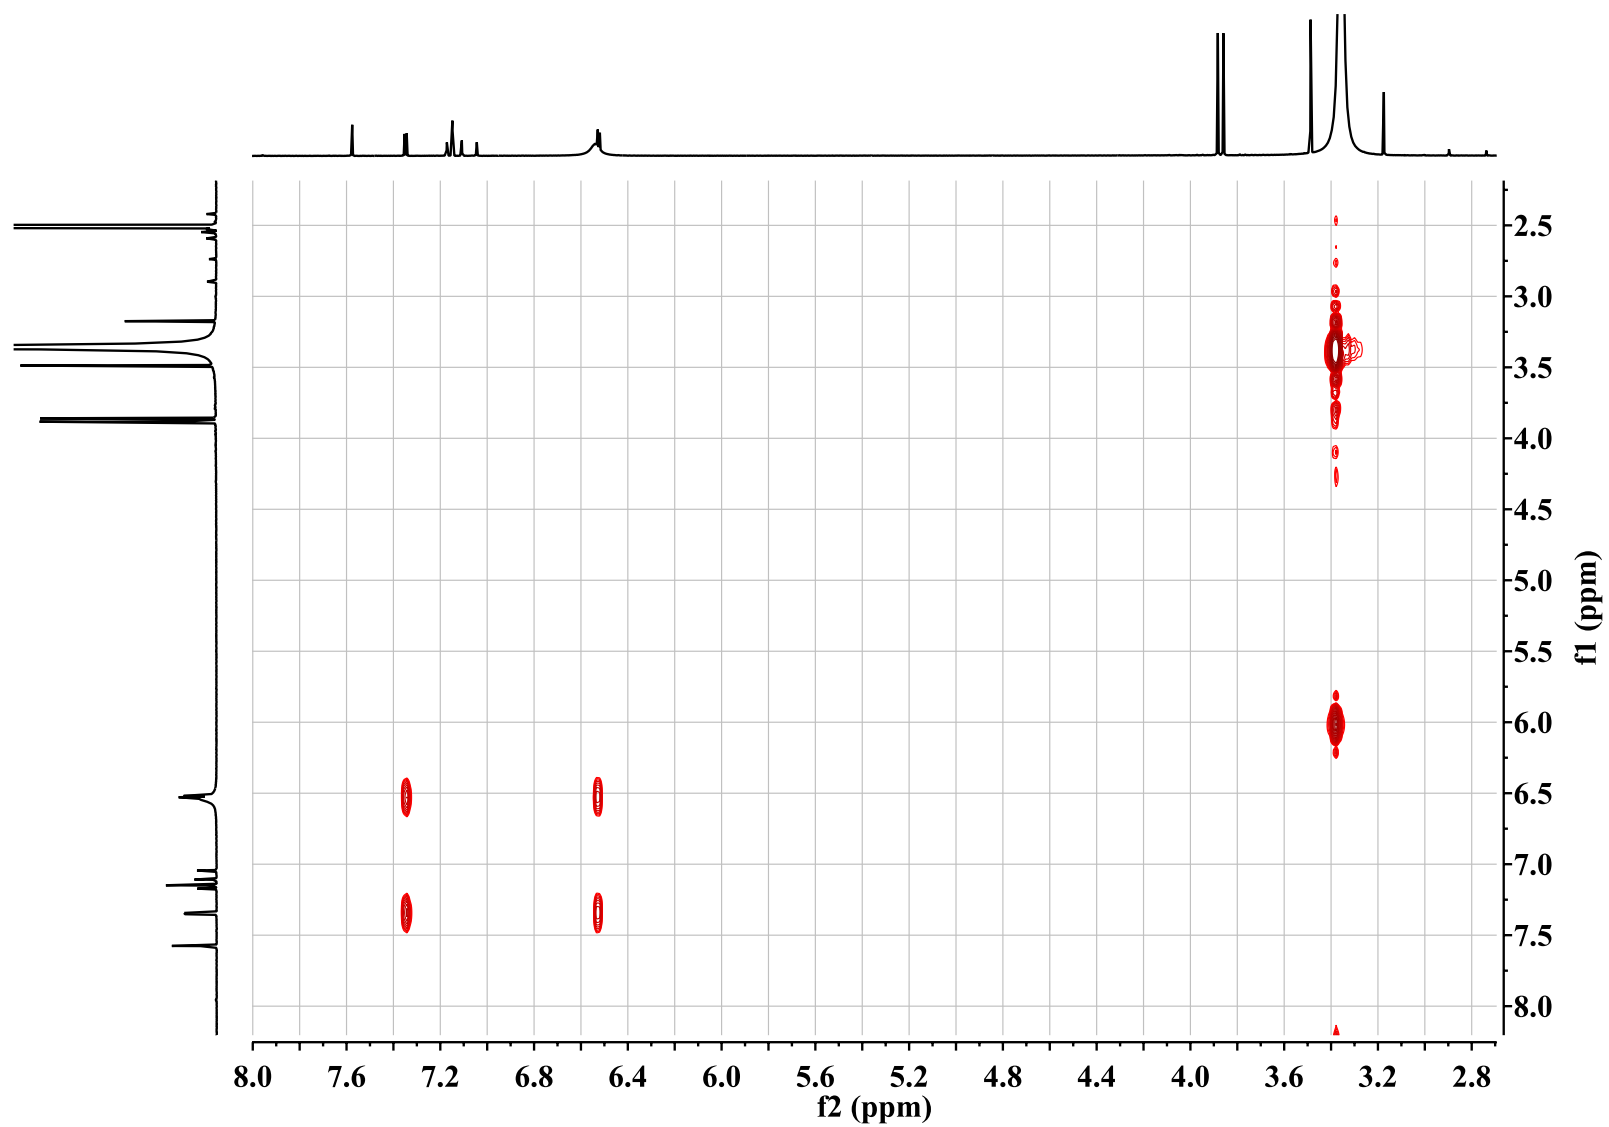

Figure S23. COSY NMR spectrum of 1-hydroxy-6,7-dimethoxy-2-methylisoquinoline trifluoroacetate (**5**)

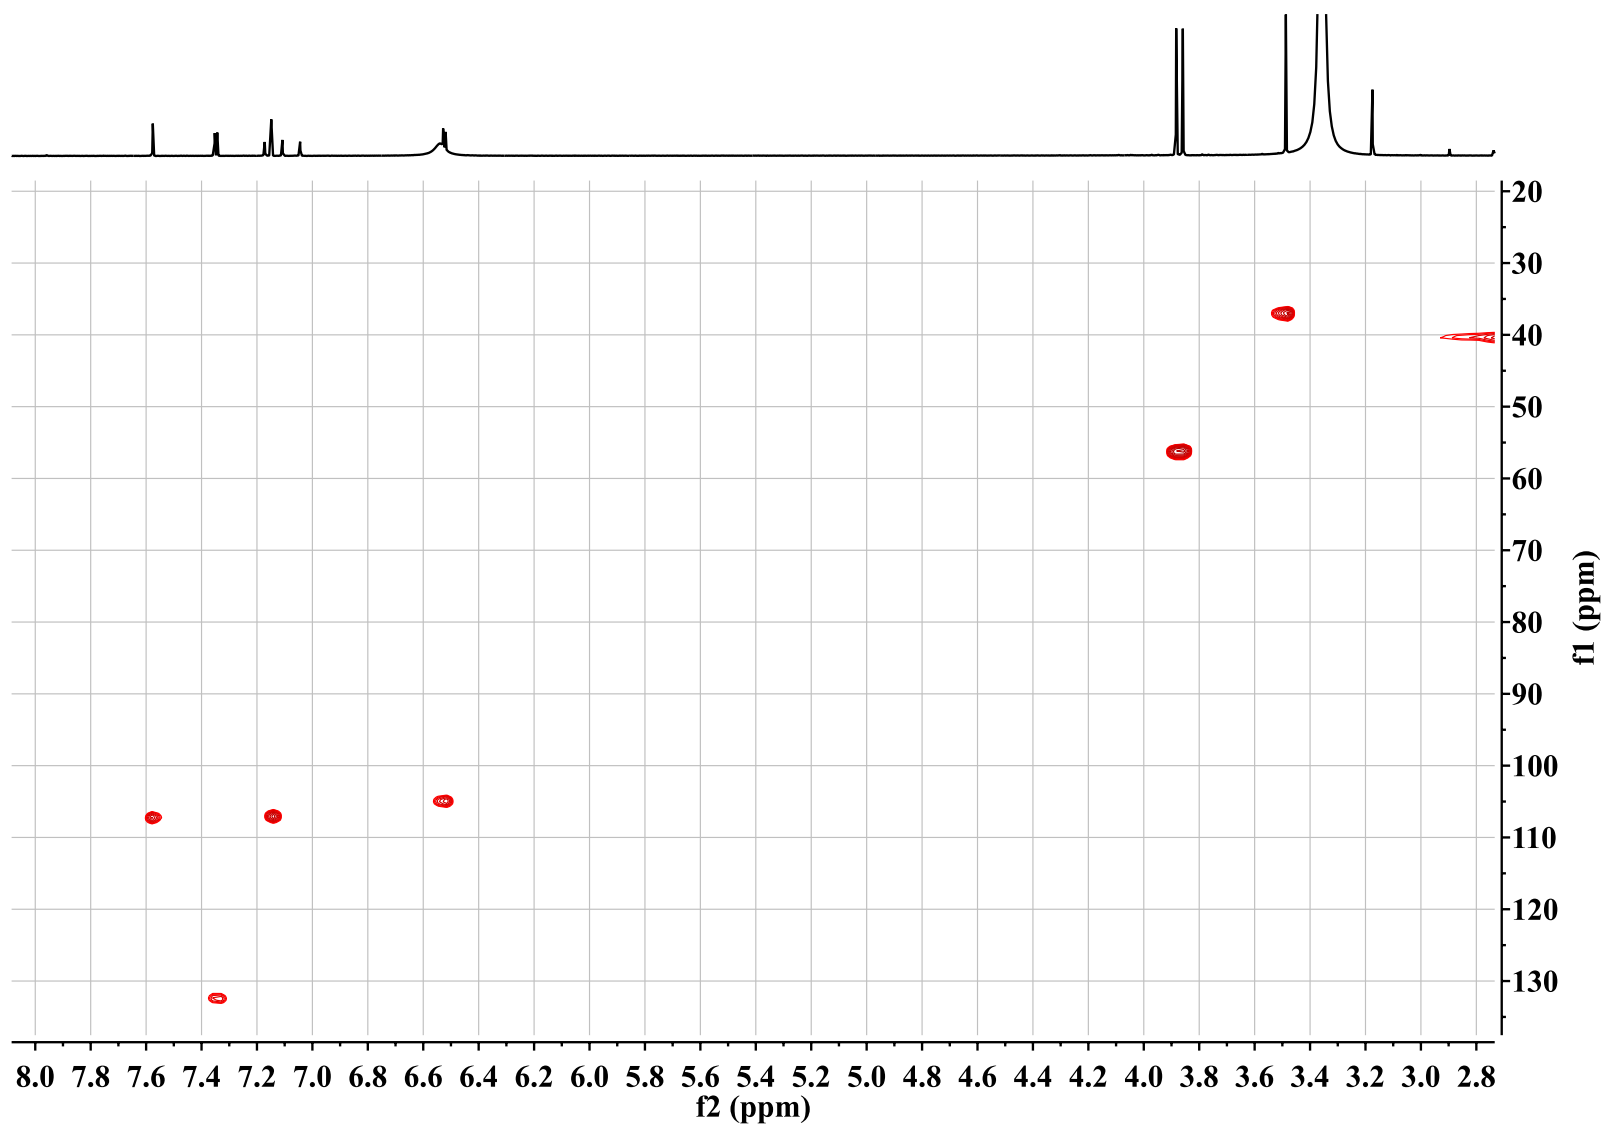

Figure S24. HSQC NMR spectrum of 1-hydroxy-6,7-dimethoxy-2-methylisoquinoline trifluoroacetate (5)

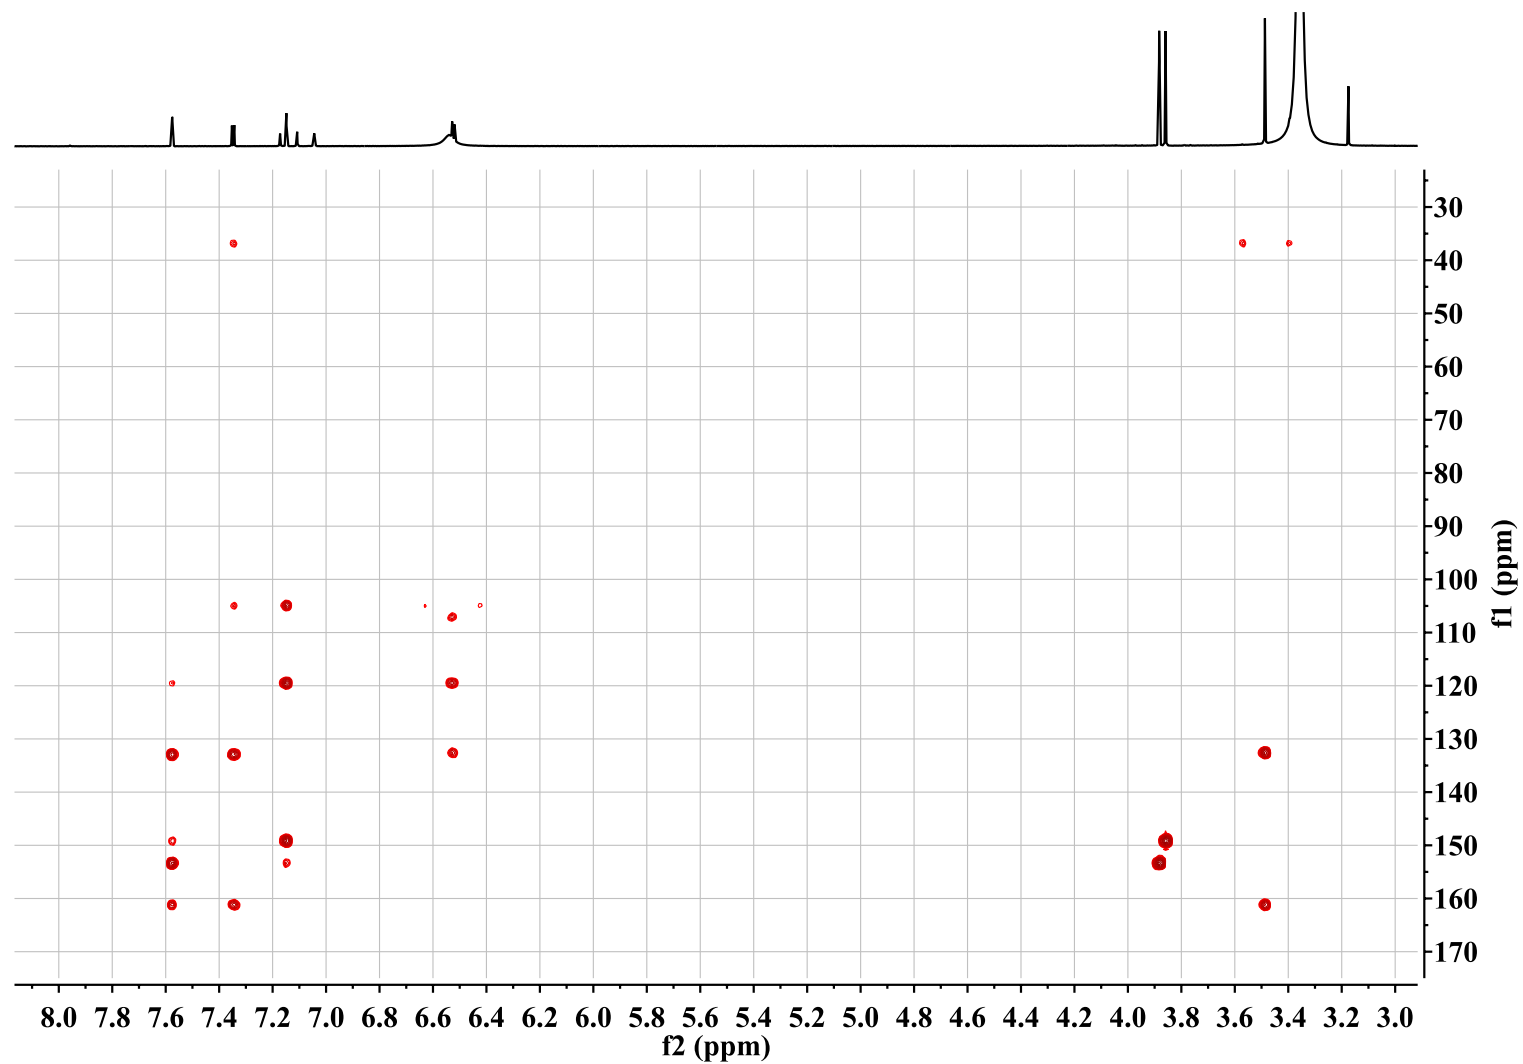

Figure S25. HMBC NMR spectrum of 1-hydroxy-6,7-dimethoxy-2-methylisoquinoline trifluoroacetate (5)

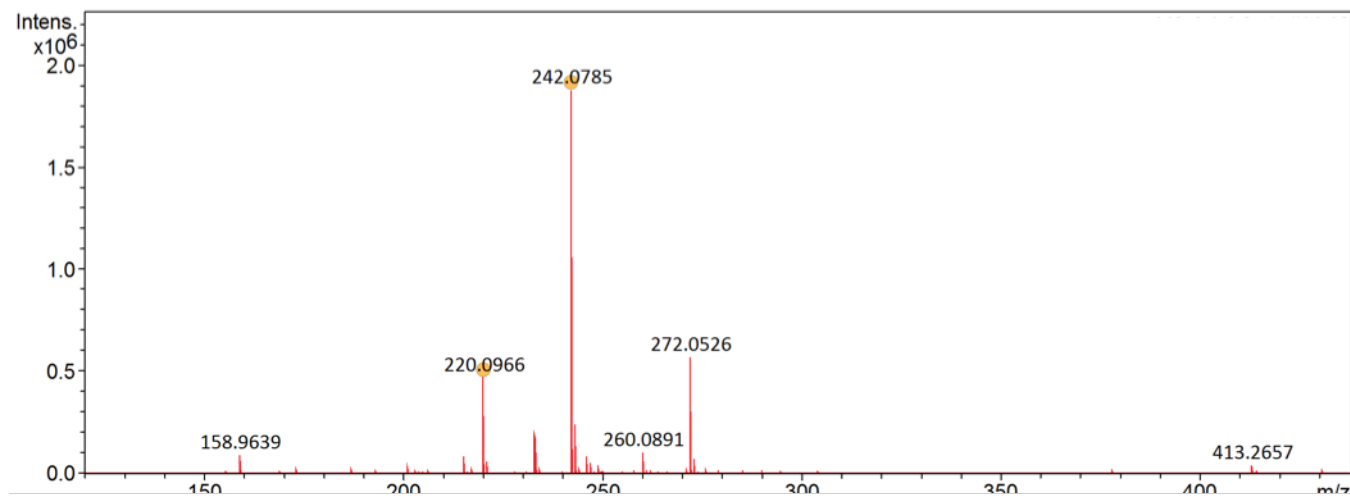

| Means. m/z | Ion formula                                       | calc. m/z | err [ppm] | rdb | e <sup>-</sup> Conf | N-Rule |
|------------|---------------------------------------------------|-----------|-----------|-----|---------------------|--------|
| 220.0966   | C <sub>12</sub> H <sub>14</sub> NO <sub>3</sub>   | 220.0968  | 1.0       | 6.5 | even                | ok     |
| 242.0785   | C <sub>12</sub> H <sub>13</sub> NNaO <sub>3</sub> | 242.0788  | 1.1       | 6.5 | even                | ok     |

**Figure S26.** HRMS spectrum of 1-hydroxy-6,7-dimethoxy-2-methylisoquinoline trifluoroacetate (**5**)

Table S1. Stable conformers of (*R*)-nomimantharine trifluoroacetate (**2**)

| Conformer | Conformation                                                                        | Energy (kcal/mol) | Percent (%) |
|-----------|-------------------------------------------------------------------------------------|-------------------|-------------|
| 2-1       | 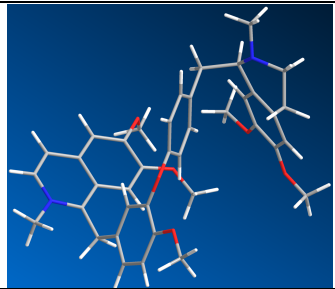   | -1300666.800      | 67.3        |
| 2-2       |    | -1300665.662      | 9.8         |
| 2-3       |   | -1300665.576      | 8.5         |
| 2-4       |  | -1300665.506      | 7.5         |
| 2-5       |  | -1300665.079      | 3.7         |
| 2-6       |  | -1300664.989      | 3.2         |
